2

3

**Title:**

4

**BBSome trains remove activated GPCRs from cilia by enabling passage**

5

**through the transition zone**

6

7

**Authors:** Fan Ye<sup>1,2,†</sup>, Andrew R. Nager<sup>2,†</sup> and Maxence V. Nachury<sup>1,2</sup>

8

**Affiliations:**

9

<sup>1</sup>Department of Ophthalmology, University of California San Francisco, CA 94143, USA

10

<sup>2</sup>Department of Molecular and Cellular Physiology, Stanford University School of Medicine, CA

11

94305, USA

12

13

† Fan Ye and Andrew R. Nager contributed equally to this work

14

15

Correspondence to Maxence V. Nachury

16

[maxence.nachury@ucsf.edu](mailto:maxence.nachury@ucsf.edu)

17

## 2 **Summary**

3 Upon activation, GPCRs must exit cilia for appropriate signal transduction. Using bulk imaging  
4 of BBSome and single molecule imaging of GPCRs, Ye et al. demonstrate that retrograde  
5 BBSome trains assemble on-demand upon GPCR activation and ferry GPCRs across the  
6 transition zone. Yet, ciliary exit often fails because of a second diffusion barrier.

## 2 **Abstract**

3 A diffusion barrier at the transition zone enables the compartmentalization of signaling  
4 molecules by cilia. The BBSome and the small GTPase Arl6, which triggers BBSome coat  
5 polymerization, are required for the exit of activated signaling receptors from cilia, but how  
6 diffusion barriers are crossed when membrane proteins exit cilia remains to be determined. Here  
7 we found that activation of the ciliary GPCRs Smoothed and SSTR3 drove the Arl6-dependent  
8 assembly of large, highly processive and cargo-laden retrograde BBSome trains. Single-molecule  
9 imaging revealed that the assembly of BBSome trains enables the lateral transport of ciliary  
10 GPCRs across the transition zone. Yet, the removal of activated GPCRs from cilia was  
11 inefficient because a second, periciliary diffusion barrier was infrequently crossed. We conclude  
12 that exit from cilia is a two-step process in which BBSome/Arl6 trains first moves activated  
13 GPCRs through the transition zone before a periciliary barrier can be crossed.

## 2 **Introduction**

3 Diffusion barriers establish the identity of the apical membrane in polarized epithelial cells, of  
4 the axon in neurons, of the daughter cell in budding yeast, and of cilia by impeding the lateral  
5 movement of membrane proteins (Trimble and Grinstein, 2015). The compartmentalization of  
6 cilia enables dynamic changes in ciliary composition through regulated trafficking. Upon  
7 Hedgehog pathway activation, the 7-transmembrane protein Smoothed accumulates in cilia  
8 while ciliary exit of the G protein coupled receptor (GPCR) GPR161 ensures the appropriate  
9 transduction of Hedgehog signals (Bangs and Anderson, 2017; Nager et al., 2017). While  
10 trafficking across the tight junction, the axon initial segment and the yeast bud neck involves a  
11 vesicular carrier intermediate, the mechanisms of ciliary barrier crossing remain undetermined.  
12 The ciliary diffusion barrier has been localized to the transition zone, an ultrastructural  
13 specialization between the transition fibers of the basal body and the cilium shaft (Garcia-  
14 Gonzalo and Reiter, 2012; Gonçalves and Pelletier, 2017). Three hypotheses have been advanced  
15 for crossing the transition zone (Nachury et al., 2010; Jensen and Leroux, 2017). First, the  
16 detection of vesicles inside the transition zone indicates that a vesicular carrier may transport  
17 cargoes across this barrier (Jensen et al., 2004; Chuang et al., 2015). Second, indirect evidence  
18 for lateral transport between plasma and ciliary membranes (Hunnicuttt et al., 1990; Milenkovic  
19 et al., 2009) suggests that membranous cargoes laterally traverse the transition zone by active  
20 transport. Third, the regulated opening of a gate inside the transition zone may let selective  
21 cargoes move through this membranous barrier (Dyson et al., 2017).

22 The active transport of proteins inside cilia –termed intraflagellar transport– is powered by  
23 microtubule motors moving along axonemal microtubules. It is now clear that axonemal  
24 precursors such as  $\alpha/\beta$ -tubulin are delivered to the tip of cilia by anterograde IFT trains

2 (Lechtreck, 2015; Kubo et al., 2016). In contrast, it is not known where, when and how  
3 membrane proteins are selected for ciliary exit and prior studies of ciliary signaling receptors  
4 dynamics by single-molecule imaging failed to uncover extended IFT movements (Ye et al.,  
5 2013; Milenkovic et al., 2015).

## 6 **Results**

### 7 **Low-level expression recapitulates physiological ciliary trafficking dynamics**

8 To characterize transition zone crossing by membranous cargoes, we sought a system where  
9 membrane proteins move across the transition zone in a synchronized manner. GPR161 and the  
10 prototypical ciliary GPCR somatostatin receptor 3 (SSTR3) both undergo retrieval from the  
11 cilium and back into the cell upon activation (Mukhopadhyay et al., 2013; Green et al., 2016).  
12 GPR161, a core component of the Hedgehog pathway that couples to  $G\alpha_s$ , exits cilia when  
13 Smoothened is activated either indirectly by Hedgehog or directly by the Smoothened agonist  
14 SAG (Pal et al., 2016) (Fig. **1A**). Meanwhile, SSTR3 is a well-characterized  $G\alpha_i$ -coupled  
15 receptor that has undergoes agonist-dependent retrieval (Nager et al., 2017; Green et al., 2016)  
16 (Fig. **1A**). Consistent with previous studies on SSTR3 in hippocampal neurons (Green et al.,  
17 2015), most of SSTR3 immunofluorescence was lost from neuronal cilia after 6 h treatment with  
18 the ligand somatostatin-14 (sst) or the SSTR3-specific agonist L796,778 (Fig. **1B** and **S1A-C**).  
19 Similar to endogenous SSTR3, ciliary exit of endogenous GPR161 proceeds over the course of  
20 several hours (Mukhopadhyay et al., 2013). Signal-dependent retrieval is thus a considerably  
21 slower process than signal-dependent endocytosis.

22 To dissect ciliary exit, we expressed GPCRs in mouse Inner Medullar Collecting Duct (IMCD3)  
23 kidney cells, a widely used cell line for ciliary trafficking studies. GPCRs were tagged on the

2 intracellular C-terminus with a fluorescent protein (GFP or NeonGreen, NG, (Shaner et al.,  
3 2013)) while a biotinylation acceptor peptide (AP) on the extracellular N-terminus combined  
4 with co-expression of the biotin ligase BirA enabled pulse-chase studies with fluorescently  
5 labeled monovalent streptavidin (mSA) (Howarth and Ting, 2008). When <sup>AP</sup>SSTR3<sup>GFP</sup> under the  
6 control of the EF1 $\alpha$  promoter was stably expressed in IMCD3 cells by single integration at the  
7 FlpIn locus, agonist-dependent exit of SSTR3 from cilia was undetectable. Molecular counting  
8 of GFP and comparison of immunofluorescence intensities revealed that pEF1 $\alpha$ -driven  
9 expression resulted in SSTR3 levels that were an order of magnitude greater than in neurons  
10 (Fig. **1C**, top). Congruently, pEF1 $\alpha$ -driven <sup>AP</sup>SSTR3<sup>GFP</sup> expression resulted in a near doubling of  
11 cilia length, likely due to protein overload driving ciliary membrane expansion and  
12 compensatory axoneme growth (Fig. **1C**, bottom) (Guadiana et al., 2013). To express SSTR3 at  
13 levels closer to those found in neurons, we tested a variety of weak promoters and found that an  
14 EF1 $\alpha$  promoter lacking the TATA box (pEF1 $\alpha^{\Delta}$ ) produced ciliary amounts of SSTR3 similar to  
15 those found in neurons (Fig. **1C**, top). pEF1 $\alpha^{\Delta}$ -driven expression of SSTR3 did not alter ciliary  
16 length (Fig. **1C**, bottom). IMCD3-[pEF1 $\alpha^{\Delta}$ -<sup>AP</sup>SSTR3<sup>NG</sup>] cells recapitulated SSTR3 exit from  
17 cilia upon sst addition with nearly identical kinetics as in hippocampal neurons (Fig. **1B** and  
18 **S1D**). Similarly, the Hedgehog signaling-dependent exit of GPR161 was recapitulated by  
19 expressing <sup>AP</sup>GPR161<sup>NG3</sup> from the  $\delta$ -crystallin promoter (Fig. **1D**). pEF1 $\alpha^{\Delta}$ -driven expression of  
20 NPY2R<sup>NG</sup> and MCHR1<sup>NG</sup> yielded low ciliary levels (Fig. **S1E**) with similar exit kinetics (Nager  
21 et al., 2017), thus demonstrating the broad applicability of low-expression promoters for  
22 studying the dynamics of ciliary GPCRs.

23 Calibration of the NeonGreen signal with recombinant proteins spotted on glass slides (Fig. **1E**)  
24 allowed the measurement of absolute levels of GPCRs per cilia (Fig. **S1F-H**) and, together with

2 pulse-chase labelling with mSA-647, enabled a specific quantitation of signal-dependent exit  
3 rates at close to 500 molecules per hour (Fig. **1F-G**, Movie **S1**). In support of the precision of  
4 our absolute quantitation, using pEF1 $\alpha^{\Delta}$ -driven SSTR3<sup>NG</sup> or SSTR3<sup>GFP</sup> and independent  
5 calibrators yielded very similar numbers of SSTR3 molecules per cilium (Fig. **1C**).  
6 Further highlighting the power of AP and NG-tagged GPCRs, the increased signal-to-noise ratio  
7 afforded by the direct labeling with NG or mSA647 compared to immunofluorescence (Fig. **S1I**)  
8 made it possible to detect very low abundance proteins whose presence in cilia escapes detection  
9 by traditional immunostaining techniques (Fig. **S1J**). The decreased threshold of detection when  
10 pulse-labeling with mSA647 ensures a more faithful visualization of exit kinetics than when exit  
11 is monitored by immunostaining (Fig. **1B** and **F**).

12 In the absence of agonist, the NG fluorescence of <sup>AP</sup>SSTR3<sup>NG</sup> increased over time whereas the  
13 signal from pulse labeling with mSA647 remained constant for 6h (Fig. **S1K**). In the presence of  
14 agonist, the exit kinetics of <sup>AP</sup>SSTR3<sup>NG</sup> were slower when monitored by direct visualization of  
15 the NG tag than by pulse-labeling with mSA647 (Fig. **S1K**). Since pulse labeling only reports on  
16 SSTR3 exit while the NG signal measures the total ciliary levels, these results indicate that the  
17 newly synthesized <sup>AP</sup>SSTR3<sup>NG</sup> continues to enter cilia during the course of the experiment. We  
18 surmise that our previous attempts to assay signal-dependent exit of SSTR3 using strong  
19 promoters failed because the entry of newly-synthesized GPCRs outpaced the slow exit kinetics.

## 20 **Sorting complexes for ciliary entry and exit**

21 The low expression systems made it possible to validate the sorting complexes that carry out  
22 ciliary entry and exit. IFT-A is a complex of 6 protein with structural elements that suggest a  
23 common ancestry with coat complexes (Jékely and Arendt, 2006; van Dam et al., 2013) and IFT-

2 A is recruited to membranes by the PI(4,5)P<sub>2</sub>-binding protein Tulp3 (Mukhopadhyay et al.,  
3 2010). Although IFT-A is often described as the central mediator of retrograde transport  
4 (Lechtreck, 2015), IFT-A and TULP3 are required for the import of many GPCRs into cilia  
5 (Mukhopadhyay et al., 2010, 2013; Loktev and Jackson, 2013; Fu et al., 2016; Hwang et al.,  
6 2017). We confirmed that Tulp3 was required for ciliary entry of SSTR3, NPY2R and MCHR1  
7 (Fig. **2A** and **S2A-C**) and refined indirect interaction data by showing that the ciliary targeting  
8 signal of SSTR3 encoded within the third intracellular loop (i3) (Berbari et al., 2008a) is  
9 specifically and directly recognized by the purified IFT-A complex (Fig. **2B**) or by the IFT-A  
10 subunit IFT140 overexpressed in HEK cells (Fig. **S2D**). We conclude that IFT-A/Tulp3  
11 functions as a coat adaptor complex that mediates GPCR entry into cilia by directly recognizing  
12 sorting signals (Fig. **2C**).

13 Consistent with the requirement for the GPCR activation sensor  $\beta$ -arrestin 2 in GPR161 retrieval  
14 (Pal et al., 2016), signal-dependent retrieval of SSTR3 required  $\beta$ -arrestin 2 (Fig. **2D-E** and **S2E-**  
15 **F**) (Green et al., 2016).

16 The BBSome, a complex of eight Bardet-Biedl Syndrome (BBS) proteins, resembles coat  
17 adaptors at the structural level and polymerizes into a planar coat upon recruitment to  
18 membranes by the GTP-bound form of the small GTPase Arl6/BBS3 (Jin et al., 2010). The  
19 function of the BBSome in entry vs. exit remains controversial. While BBSome mutants have  
20 decreased ciliary levels of the GPCRs somatostatin receptor 3 (SSTR3), melanin concentrating  
21 hormone receptor 1 (MCHR1), and NPY2R and of the polycystic kidney disease protein PKD1  
22 (Berbari et al., 2008b; Loktev and Jackson, 2013; Su et al., 2014), GPR161, SMO and D1R fail  
23 to exit cilia in BBSome or Arl6 mutants (Zhang et al., 2011; Liew et al., 2014; Eguether et al.,  
24 2014; Yee et al., 2015; Nager et al., 2017). Finally, systematic studies find that some proteins



2 accumulate while others are depleted from *Bbs* mutant cilia (Mick et al., 2015; Lechtreck et al.,  
3 2013; Datta et al., 2015). In our near-endogenous expression systems, deletion of *Arl6* or of the  
4 candidate *Arl6* activator *Ift27/BBS19* or of  $\beta$ -arrestin2 did not reduce the steady-state ciliary  
5 levels of *SSTR3* (Fig. **2A** and **S2F**). Instead, the BBSome, *Arl6* and *Ift27* were required for the  
6 signal-dependent retrieval of *SSTR3* and *GPR161* (Fig. **2D-E** and **S2G-H**). The carboxy-  
7 terminal tail of *GPR161* (*GPR161*<sup>Ct</sup>) and the third intracellular loop of *SSTR3* (*SSTR3*<sup>i3</sup>) directly  
8 interacted with purified BBSome (Fig. **2F**) (Jin et al., 2010), suggesting that BBSome coats sort  
9 signaling receptors through the direct recognition of cytoplasmic determinants. Since *SSTR3* and  
10 *GPR161* are recognized by  $\beta$ -arrestin 2 in a signal-dependent manner (Pal et al., 2016; Roth et  
11 al., 1997), we conclude that the signal-dependent retrieval of *GPR161* and *SSTR3* is jointly and  
12 directly mediated by  $\beta$ -arrestin 2 and the BBSome (Fig. **2G**).

13 **Signal-dependent BBSome redistribution to the tip of cilia triggers GPCR retrieval** To  
14 characterize the mechanisms of transition zone crossing by exiting GPCRs, we first sought to  
15 determine how BBSome coats facilitate signal-dependent retrieval. The movement of trains  
16 consisting of the intraflagellar transport complex B (IFT-B) can be visualized by imaging foci of  
17 the IFT-B subunit *IFT88* tagged with NeonGreen traveling in the anterograde and retrograde  
18 direction inside cilia (Movie **S2**). Imaging of nematode, *Chlamydomonas* and mammalian cilia  
19 has shown that BBSome foci frequently co-move with IFT-B foci (Ou et al., 2005; Lechtreck et  
20 al., 2009; Liew et al., 2014; Williams et al., 2014), suggesting coupling between the two  
21 complexes. To follow the dynamics of the BBSome and of IFT-B during *SSTR3* and *GPR161*  
22 signal-dependent retrieval, we expressed <sup>NG3</sup>*BBS5* or <sup>NG3</sup>*IFT88* at near-endogenous levels (Fig.  
23 **3A** and **S2I**, Movie **S3**). In the absence of signaling, the BBSome and the IFT-B complex  
24 localized in a punctate pattern along the cilium (Fig. **3B-C**, **S2J-L**). Unexpectedly, *SSTR3*

2 activation led to a 4-fold enrichment of BBSome and a 2-fold enrichment of IFT-B at the tip  
3 (Fig. **3B-C**, **S2J-L**). Likewise, activation of the Hedgehog pathway resulted in BBSome  
4 accumulation at the ciliary tip (Fig. **3C** and Movie **S4**). Similar to <sup>NG3</sup>BBS5, endogenous BBS9  
5 became enriched at the tip upon activation of the Hedgehog pathway or of SSTR3 (Fig. **3D**). The  
6 BBSome thus joins a select group of Hedgehog factors that localize to the tip in a signal-  
7 dependent manner, consisting of Gli2, Gli3, SuFu and Kif7.

8 To determine whether tip enrichment of the BBSome represents a necessary step in GPCR  
9 retrieval, we sought to define and manipulate the molecular mechanisms of signal-dependent tip  
10 accumulation. Since SSTR3 and Smoothened are known to couple to  $G\alpha_i$  and reduce cAMP  
11 production through  $G\alpha_i$ -mediated inhibition of adenylate cyclases 5 and 6 (AC5/6) (Yasuda et  
12 al., 1992; Shen et al., 2013), we tested for the role of signaling downstream of  $G\alpha_i$  in promoting  
13 BBSome tip enrichment (Fig. **3E**). Pharmacological inhibition of  $G\alpha_i$  by Pertussis toxin (PTX)  
14 blocked SAG- and sst-induced BBSome tip accumulation (Fig. **3C**). Meanwhile, inhibition of  
15 AC6 (Fig. **S2M**) or inhibition of the cAMP-dependent protein kinase (PKA) by Rp-cAMPs or by  
16 a cell permeable PKA inhibitory peptide (myr-PKI) led to BBSome tip accumulation in the  
17 absence of GPCR activation (Fig. **3C**). Furthermore, cilia-targeted PKI (Mick et al., 2015) was  
18 sufficient to redistribute BBSome to the tip (Fig. **3F**). Together with the findings of cilia-  
19 localized AC5 and AC6 (Mick et al., 2015; Masyuk et al., 2008; Kwon et al., 2010), these results  
20 suggest that activation of Smoothened and SSTR3 reduce the tonically high levels of ciliary  
21 cAMP (Moore et al., 2016) through  $G\alpha_i$ -mediated inhibition of AC5/6 within cilia. Since PKA  
22 was recently shown to reside and function inside cilia (Mick et al., 2015; Moore et al., 2016), we  
23 propose that PKA antagonizes the recruitment of BBSome to the tip of cilia in unstimulated cells

2 and that activation of  $G\alpha_i$ -coupled GPCRs promotes BBSome tip recruitment by reducing the  
3 activity of ciliary PKA (Fig. **3E**).

4 Importantly, pharmacological alterations of the ciliary  $G\alpha_i$ -PKA axis concordantly affected  
5 signal-dependent redistribution of BBSome to the tip of cilia and signal-dependent GPCR  
6 retrieval as the rates of signal-dependent retrieval of GPR161 and SSTR3 were greatly reduced  
7 by PTX (Fig. **4A-B**) and significantly accelerated by myrPKI (Fig. **4C-D**). We note that PKA  
8 inhibition was not sufficient to trigger retrieval of GPR161 or SSTR3 in the absence of receptor  
9 stimulation (Fig. **4C-D**), suggesting the existence of mechanisms that act non-redundantly with  
10 the  $G\alpha_i$ -PKA-BBSome axis (e.g.  $\beta$ -arrestin 2). In support of this hypothesis, SSTR3 activation  
11 was sufficient to elicit the retrieval of GPR161 with identical kinetics to Smoothed activation  
12 (Fig. **4E**). In contrast, Smoothed activation was not sufficient to promote SSTR3 retrieval (Fig.  
13 **4F**). As the mechanisms that underlie the activation of GPR161 remain unknown, it is  
14 conceivable that signaling downstream of SSTR3 (through  $G\alpha_i$  or  $G\beta\gamma$ ) triggers activation of  
15 GPR161 and that the subsequent engagement of  $\beta$ -arrestin 2 onto GPR161 cooperates with the  
16  $G\alpha_i$ -PKA-BBSome axis to promote GPR161 retrieval. In contrast, SSTR3 can only be activated  
17 by specific ligands.

18 To further establish that BBSome tipping represents a necessary intermediate in GPCR retrieval,  
19 we sought to identify molecules that recruit the BBSome to the tip of cilia in a signal-dependent  
20 manner. The plus-end directed microtubule motor Kif7 represents a candidate tip recruitment  
21 factor because Kif7 accumulates at the tip of cilia upon Hedgehog pathway activation (Liem et  
22 al., 2009; Endoh-Yamagami et al., 2009) and is necessary and sufficient to promote tip  
23 accumulation of the Hedgehog signaling factors Gli2 and Gli3 (He et al., 2014). Furthermore,  
24 *KIF7* is a genetic modifier of Bardet-Biedl Syndrome in human patients (Putoux et al., 2011). To

2 follow the behavior of Kif7 and the BBSome in live IMCD3 cells, we stably co-expressed  
3 <sup>NG3</sup>BBS5 and Kif7 fused to the red fluorescent protein mScarlet. Smoothened activation led to  
4 the correlated co-accumulation of BBS5 and Kif7 at the tip of cilia (Fig. **5A-B**). Furthermore, in  
5 the rare instances where a second spot of Kif7 was found along cilia, possibly because part of the  
6 axoneme terminates prior to the tip, a similarly intense second spot of BBS5 was observed at the  
7 same location (Fig. **5C**). Since Kif7 depletion abolished tip accumulation of the BBSome (Fig.  
8 **5D-E**), these data suggest that Kif7 directly mediates the signal-dependent recruitment of  
9 BBSome to the tip of cilia. Alternatively, it is conceivable that structural defects in cilia of Kif7-  
10 depleted cells indirectly affect the recruitment of BBSomes to the tip. Congruent with a Kif7-  
11 mediated recruitment of BBSome to tips of cilia, Kif7 was found to co-immunoprecipitate with  
12 several BBSome subunits (Fig. **S2N**). Given that dephosphorylation of Kif7 leads to the  
13 accumulation of Kif7 at the tip of cilia (Liu et al., 2014), we considered that phosphorylation by  
14 PKA may directly antagonizes Kif7 tip accumulation and the Kif7-BBSome interaction.  
15 Concordantly, PKI led to the correlated co-accumulation of BBS5 and Kif7 at the tip of cilia to  
16 the same extent as SAG (Fig. **5A-B**) and elevated cAMP levels decreased the Kif7-BBSome  
17 interaction (Fig. **5F**). Finally, Kif7 was required for signal-dependent retrieval of SSTR3 (Fig.  
18 **5G**). Together, these results suggest that signaling downstream of Smoothened and SSTR3 leads  
19 to Kif7 dephosphorylation and that ensuing recruitment of BBSome to the tip initiates GPCR  
20 retrieval.

## 21 **BBSome tip accumulation drives formation of cargo-laden retrograde trains**

22 Analysis of <sup>NG3</sup>BBS5 and <sup>NG3</sup>IFT88 kymographs showed that anterograde BBSome trains,  
23 anterograde IFT trains and retrograde IFT trains moved processively along the length of the  
24 cilium regardless of the signaling status (Fig. **6A** and **S3A-B**). Yet in unstimulated cells,

2 BBSome trains occasionally detached from retrograde IFT trains before reaching the base (Fig.  
3 **6B**) and overall, 90% of BBSome trains failed to reach the base of cilia (Fig. **6A, C** and **S3B**).  
4 Activation of Smoothed or SSTR3 or inhibition of PKA all doubled the number of BBSomes  
5 per retrograde train from 10 to 20 (Fig. **6D**) and led to a significant increase in the processivity of  
6 retrograde BBSome trains (Fig. **6C** and **S3B**). Neither the frequencies nor the velocities of  
7 BBSome trains were affected by these treatments (Fig. **6E-F**). Meanwhile, SAG increased the  
8 number of IFT-B particles per retrograde train from 62 to 78 (Fig. **6G**). The addition of 106  
9 BBSomes and 206 IFT-B to the tip upon SSTR3 activation (Fig. **3C** and **S2L**) suggests that the  
10 signal-dependent accumulation of BBSome and IFT-B at the tip drives the growth of retrograde  
11 trains by increasing the concentration of precursors at the site of assembly. Similar to the  
12 BBSome and IFT-B, Arl6 underwent signal-dependent tip accumulation (Fig. **6H**). As Arl6 was  
13 required for IFT88 tipping but not BBSome tipping (Nager et al., 2017) (Fig. **S2L**), Arl6 may  
14 recruit IFT-B particles to the tip by increasing the affinity of the BBSome for IFT-B.  
15 PKI was sufficient to trigger tip accumulation of BBSome and Arl6 as well as the formation of  
16 large processive retrograde BBSome trains (Fig. **6D, H** and **S3B**), suggesting that recruitment of  
17 Arl6 and BBSome to the tip may be sufficient to initiate the assembly of large processive  
18 retrograde IFT/BBSome trains. Because Arl6 and its candidate activator Ift27 were required for  
19 the signal-dependent formation of large processive BBSome trains (Fig. **6C-D** and **S3C**), we  
20 propose that BBSome coats polymerized upon Arl6-GTP binding become stably coupled to IFT-  
21 B trains to generate the large, signal-dependent, and processive retrograde BBSome/IFT trains.  
22 Tip redistribution upon GPCR activation was not limited to the BBSome and IFT-B as GPR161  
23 (Fig. **7A-B**) also underwent tip redistribution. Photobleaching the cilium exclusive of the tip  
24 revealed an enrichment of GPR161 at the tip upon Hh pathway activation (Fig. **7A-B**). Recovery

2 kinetics show that GPR161 at the tip became less dynamic after SAG treatment (Fig. 7C). In  
3 support of an association between BBSome and activated GPCRs at the tip of cilia, we find that  
4 WGA-mediated immobilization of membrane proteins increases the amount of BBSome at the  
5 tip, most likely because BBSome-GPCR complexes are unable to leave the tip (Fig. 7D).  
6 Furthermore, WGA treatment increases the amount of BBSome throughout the length of cilia  
7 (Fig. 7D), indicating that BBSome trains become trapped by immobilized GPCRs.  
8 The bright and processive retrograde BBSome tracks observed upon sst addition frequently  
9 overlapped with faint tracks of SSTR3 (Fig. 7E, Movie S5). No co-movement was observed  
10 between the faint BBSome trains and SSTR3 in the absence of Arl6 (Fig. 7E and S3D). These  
11 observations suggest that BBSome/Arl6 coats capture cargoes and move them from tip to base of  
12 cilia upon coupling to retrograde IFT trains.

### 13 **Signaling promotes the processive retrograde movement of GPCRs**

14 In bulk fluorescence imaging, the few fluorescent GPCRs that are being trafficked tend to  
15 be obscured by the fluorescent GPCRs that remain inside cilia. We measured that the largest  
16 retrograde trains contain close to 50 BBSomes. Assuming a 1:1 stoichiometry between BBSome  
17 and cargo, this indicates that the brightest retrograde cargo tracks can carry at most  
18  $50/3129=1.6\%$  of the total ciliary SSTR3. It is therefore expected that such tracks will be  
19 extremely faint by bulk imaging (Fig. 7E). To overcome the limitations inherent to ensemble  
20 imaging, we set out to visualize the molecular events that underlie GPCR retrieval at single-  
21 molecule resolution. Combining site-specific biotinylation of AP-tagged GPCRs (Ye et al., 2013)  
22 with streptavidin-coupled quantum dots (<sup>SA</sup>Qdot) enabled imaging at 2 Hz for over 20 min  
23 (compared to 30-60s when using mSA647) (Fig. S3E). By blocking most surface-exposed biotin  
24 groups with mSA before labeling with <sup>SA</sup>Qdot, the vast majority of cilia bore no <sup>SA</sup>Qdot and cilia

2 bearing one <sup>SA</sup>Qdot are expected to possess a single biotinylated <sup>AP</sup>GPCR (Fig. **8A**). Tracking of  
3 <sup>SA</sup>Qdot-labeled GPCRs (<sup>QD</sup>GPCRs) demonstrated that their dynamics were unperturbed by  
4 <sup>SA</sup>Qdot labeling, consistent with a single valence of <sup>SA</sup>Qdot per GPCR.

5 First, consistent with prior single-molecule tracking studies (Ye et al., 2013; Milenkovic et al.,  
6 2015), <sup>QD</sup>SSTR3 displayed a diffusive behavior in the absence of agonist (Fig. **8D**, **S4A** and  
7 Movie **S6**) and instant velocities of diffusing GPCRs were nearly identical when labeled by  
8 mSA647 or <sup>SA</sup>QD655 (Fig. **8B**). Second, congruency of exit rates between bulk imaging and  
9 <sup>QD</sup>SSTR3 imaging indicated that <sup>SA</sup>Qdot labeling did not impair exit (Fig. **8C**). Mapping the  
10 centroid of the Qdot enabled a 7 nm measurement precision (Fig. **S3F**) that resolved the lateral  
11 displacement of <sup>QD</sup>SSTR3 around the 250 nm diameter of the ciliary membrane during diffusive  
12 events (Fig. **8Ei**). Addition of sst led to <sup>QD</sup>SSTR3 undergoing frequent confinements at the base  
13 and tip as well as processive retrograde movements (Fig. **8D-E**, **ii-iv** and **S4B** and Movie **S7**).

14 Although we occasionally observed apparent directional movement during brief periods of time  
15 for <sup>QD</sup>SSTR3 in control-treated cells (Fig. **8D** and **S4A**), persistent retrograde movements of  
16 <sup>QD</sup>SSTR3 lasting 6 s or more were strictly dependent on SSTR3 activation (Fig. **8F** and **S3G**),  
17 confirming that signaling drives formation of cargo-laden IFT/BBSome retrograde trains. This  
18 signal-dependent increase in long processive movements was not observed for anterograde  
19 movements (Fig. **8F**). Processive transport events did not exhibit lateral displacement (Fig. **8Eii-**  
20 **iv**), strongly suggesting that each cargo-laden IFT/BBSome train moves along a single axonemal  
21 microtubule. GPCRs occasionally resided for several seconds at either the tip or the base, and the  
22 frequency of confinement events –defined as residence exceeding 15s– significantly increased in  
23 the presence of sst (Fig. **8G** and **S3H**). Since processive retrograde transport events were  
24 frequently preceded by tip confinement (Fig. **8Eii** and **iv**), it is likely that tip confinement of

2 GPCRs reflects a step of cargo capture by BBSome coats assembling at the tip. Nevertheless,  
3 <sup>QD</sup>SSTR3 exhibited retrograde movements starting at any point along the cilium (Fig. **8Eiii** and  
4 **S4B**), indicative of activated GPCRs hopping onto retrograde BBSome trains.  
5 Similar to <sup>QD</sup>SSTR3, <sup>QD</sup>GPR161 underwent mostly diffusive behavior in unstimulated cells, and  
6 addition of SAG led to frequent retrograde processive transport events (Fig. **S4C-D**). Consistent  
7 with IFT/BBSome trains powering the retrograde transport of activated GPCRs, long processive  
8 retrograde movements of <sup>QD</sup>GPR161 were absent when *Arl6* was deleted (Fig. **S4E**). The average  
9 velocity of the processive retrograde movements of <sup>QD</sup>SSTR3 was similar to the velocities of IFT  
10 and BBSome trains (Fig. **6F**), suggesting that signaling promotes coupling between cargoes and  
11 retrograde IFT trains. In support of this hypothesis, co-imaging of <sup>3NG</sup>BBS5 and <sup>QD</sup>SSTR3  
12 uncovers instances of co-movement between retrograde BBSome train and <sup>QD</sup>SSTR3 (Fig. **8H**).  
13 We conclude that activated GPR161 and SSTR3 are transported in the retrograde direction by the  
14 large, processive BBSome trains that couple to retrograde IFT trains upon GPCR activation.

### 15 **Arl6 and signaling enable transition zone crossing by GPR161**

16 The expression of <sup>AP</sup>GPCRs at near-endogenous levels enabled the <sup>SA</sup>Qdot-mediated  
17 visualization of exit from the ciliary compartment at single-molecule resolution. In combined 21  
18 hours of single molecule imaging, three exit events of <sup>QD</sup>GPR161 were observed. In all three  
19 events, <sup>QD</sup>GPR161 exit followed a stereotypical sequence of processive retrograde transport, base  
20 confinement and diffusion away from the ciliary compartment (Fig. **9A-B**, event **iii**).

21 Surprisingly, many <sup>QD</sup>GPCRs that underwent retrograde transport and base confinement returned  
22 into the shaft of the cilium, seemingly by processive anterograde transport (Fig. **9A-B**, events **i**  
23 and **ii**, and **8D-E** event **iii**). During two out of the three pre-exit confinement events we observed,  
24 <sup>QD</sup>GPR161 first diffused within an area of less than 360 nm diameter before near-complete



2 immobilization prior to exit (Fig. **9C**, **S5A** and Movie **S8-9**). We did not observe a clear  
3 correlation between successful exit and either base residence time (Fig. **9D**) or area explored  
4 before exit (Fig. **9E**) suggesting that completion of exit is a stochastic process. Because  
5 <sup>QD</sup>GPR161 diffused within the 0.4  $\mu\text{m}$ -deep focal plane after exit from the ciliary compartment,  
6 it is most likely that the GPCR moved into the plasma membrane after exit (Fig. **9C**, **S5A** and  
7 Movie **S8-9**). Exit events were observed at the expected frequency based on measurements of  
8 bulk exit rates (Fig. **S5B**), this confirms that <sup>SA</sup>Qdot labeling did not interfere with exit.  
9 Unexpectedly, the position of <sup>QD</sup>GPR161 during signal-dependent base confinement events was  
10 often separate from the bulk fluorescence of GPR161<sup>NG3</sup> (Fig. **10A**). Using the profile of the  
11 NeonGreen channel as a common reference (Fig. **10A-C** and **S5C**), we mapped the location of  
12 the most base-proximal position explored by <sup>QD</sup>GPR161 relative to the transition zone marker  
13 Cep290 and the transition fiber marker Cep164 and found that activated <sup>QD</sup>GPR161 moves into  
14 the 100 nm space between these two markers (Fig. **10A-C**). We termed the region between the  
15 10<sup>th</sup> and 50<sup>th</sup> percentile of GPR161<sup>NG3</sup> fluorescence the intermediate compartment as it defined  
16 the area visited by <sup>QD</sup>GPR161 before exit was completed. Systematic analysis of <sup>QD</sup>GPR161  
17 position demonstrated that GPR161 enters the intermediate compartment in a signal- and Arl6-  
18 dependent manner (Fig. **10C**), thereby demonstrating that large, processive BBSome trains ferry  
19 GPR161 through the transition zone and deliver it to the intermediate compartment.  
20 Tracking <sup>QD</sup>GPR161 over a combined 70 min period of imaging in the presence of SAG revealed  
21 that the probability of <sup>QD</sup>GPR161 entering the intermediate compartment is 0.66 during a one  
22 minute interval (Fig. **S5D**). Meanwhile, the absolute exit rate (Fig. **1G**) of 0.0043  
23 molecules/minute is equivalent to the probability of a single molecule of GPR161 experiencing  
24 exit during a one minute interval. Thus, a comparison of intermediate compartment entry

2 frequency and ciliary exit rates revealed that less than 1% of intermediate compartment visits  
3 productively lead to exit. Meanwhile 99.3% of intermediate compartment visits are resolved by  
4 the GPCR returning into the ciliary compartment (Fig. **9A-B, i-ii**). Thus, while crossing the first  
5 diffusion barrier at the transition zone appears to be a prerequisite for ciliary exit, it is not  
6 sufficient to commit GPCRs for exit because a periciliary barrier blocks lateral diffusion between  
7 intermediate compartment and plasma membrane (Fig. **10F**).

8 Examining the lateral displacement of <sup>QD</sup>GPR161 to the center of the axoneme when <sup>QD</sup>GPR161  
9 reached its most base-proximal position in unstimulated cells confirmed that GPR161 stayed  
10 within the expected 250 nm diameter of the ciliary membrane during rapid turnaround events in  
11 unstimulated cells (Fig. **10D-E**). The mean and maximal lateral displacements of <sup>QD</sup>GPR161  
12 doubled when <sup>QD</sup>GPR161 reached its most base-proximal position in SAG-treated cells (Fig.  
13 **10D-E**). Since <sup>QD</sup>GPR161 visits its most base-proximal location in SAG-treated cells while  
14 residing within the intermediate compartment, these data indicate that the diameter of the  
15 intermediate compartment is close to 550 nm, similar to the 450 nm diameter defined by the tip  
16 of the transition fibers (Lau et al., 2012; Yang et al., 2015; Kanie et al., 2017; Yang et al., 2017).  
17 The periciliary barrier thus appears to be located near the point where the transition fibers attach  
18 to the ciliary membrane.

## 19 **Discussion**

20 Our pharmacological and live cell imaging manipulations indicate that, downstream of SSTR3  
21 and Smoothed, a  $G\alpha_i$ -mediated decrease in PKA activity promotes BBSome tip redistribution  
22 and subsequent retrieval of SSTR3 and GPR161. Intriguingly, the  $G\alpha_s$ -coupled GPCR Dopamine  
23 receptor 1 (DRD1) becomes enriched in cilia of amygdala neurons when BBSome function is  
24 compromised (Domire et al., 2011). It will be important for future studies to determine how  $G\alpha_s$ -

2 coupled GPCRs are retrieved from cilia and whether BBSome tipping is induced by DRD1  
3 activation.

4 We note that in olfactory receptor neurons, BBS4 is present in all IFT88-marked trains (Williams  
5 et al., 2014). In contrast, IFT tracks in unstimulated IMCD3 cells are often devoid of BBSome  
6 and we observed frequent uncoupling of BBSome from IFT trains (Fig. **6B**). This suggests that  
7 olfactory receptor neurons resemble IMCD3 cells under signaling conditions with respect to  
8 BBSome transport. In this context, it is notable that BBS2 and BBS4 accumulate at the tip of  
9 olfactory cilia (Williams et al., 2014) and we propose that BBSome transport is highly active in  
10 olfactory receptor neurons. According to our absolute quantitation, an average retrograde train  
11 contains 10 BBSomes and 62 IFT-B complexes in untreated cells (Fig. **6D** and **G**). The  
12 BBSome:IFT stoichiometry (6.2:1) we measure by quantitative imaging is in close concordance  
13 with that measured using quantitative mass spectrometry in *Chlamydomonas* (6.5:1) (Lechtreck  
14 et al., 2009), thus suggesting a low basal rate of BBSome-mediated transport in *Chlamydomonas*  
15 under vegetative conditions.

16 We find that base confinement events precede irreversible exit from the ciliary compartment.  
17 While activation of GPR161 and SSTR3 increased their base confinement frequencies, previous  
18 work showed that activation of Smoothened decreases its base confinement frequency  
19 (Milenkovic et al., 2015). Together with the accumulation of Smoothened in cilia of  
20 unstimulated *bbs* mutant cells (Zhang et al., 2015; Eguether et al., 2014; Goetz et al., 2017), this  
21 suggests that Smoothened is constitutively retrieved from cilia by the BBSome and that a  
22 reduction in Smoothened retrieval underlies the signal-dependent accumulation of Smoothened  
23 in cilia.

2 Although the idea of a periciliary diffusion barrier was initially considered (Nachury et al.,  
3 2010), the transition zone has come to be viewed as the sole diffusion barrier of the cilium in  
4 recent years (Garcia-Gonzalo and Reiter, 2012; Gonçalves and Pelletier, 2017; Jensen and  
5 Leroux, 2017). Our finding that the ciliary membrane is individualized from the plasma  
6 membrane by two successive diffusion barriers suggests the existence of an intermediate  
7 compartment located between the transition zone and a nearly impassable periciliary barrier.  
8 Crossing of the second barrier is extremely infrequent and is often preceded by a near-complete  
9 immobilization prior to exit. In all the exit events we imaged, <sup>QD</sup>GPR161 diffuses within the  
10 plane of imaging after exit, suggesting that the <sup>QD</sup>GPR161 stayed in the plasma membrane.  
11 However, we cannot rule out that this mobility corresponds to an endosome and that endocytosis  
12 mediates crossing of the second barrier.

13 The periciliary barrier is likely to correspond to the recently described Distal Appendage Matrix  
14 (DAM) because depletion of the DAM component FBF1 results in the leakage of GPCRs from  
15 cilia (Yang et al., 2017). Remarkably, when the receptors for insulin-like growth factor 1 (IGF1)  
16 or for transforming growth factor  $\beta$  (TGF- $\beta$ ) undergo signal-dependent exit from cilia, they  
17 transiently localize to a zone at the base of cilia that does not overlap with from axonemal  
18 markers and may correspond to the intermediate compartment. Furthermore, residence of  
19 activated IGF1R and TGF- $\beta$ R at the base of cilia appears to organize downstream signaling for  
20 these two pathways (Clement et al., 2013; Yeh et al., 2013). The intermediate compartment may  
21 harbor specific lipids as both PI(4,5)P<sub>2</sub> and PI(3,4,5)P<sub>3</sub> are dynamically enriched at a zone at the  
22 base of cilia that is clearly non-overlapping from axonemal markers in mammalian cells (Dyson  
23 et al., 2017). The intermediate compartment may therefore constitute a privileged signaling

2 locale. Finally, the existence of a second barrier explains why transition zone mutants have only  
3 mild mislocalization phenotypes and can still assemble cilia.

4 The ultrastructural location of the diffusion barrier within the transition zone is beyond the  
5 resolution of our imaging study. However, considering that <sup>QD</sup>GPR161 explores a compartment  
6 that is ~ 220 nm long during base confinement events (Fig. **9C**), and given that the distance  
7 between the tip of the distal appendages (marked by Cep164) and the proximal end of the  
8 transition zone (marked by Cep290) is ~ 100 nm (Yang et al., 2015), it is likely that the  
9 intermediate compartment encompasses part of the transition zone and that the diffusion barrier  
10 is located within the most distal part of the transition zone (Fig. **10F**).

11 Furthermore, since activated GPR161 only crosses the transition zone when BBSome/Arl6 coat  
12 assembly is permitted, the hypothesis that Hedgehog signaling loosens the diffusion barrier of  
13 the transition zone (Dyson et al., 2017) cannot account for GPR161 exit. Instead, our data  
14 suggests that BBSome/Arl6 coats bound to retrograde IFT trains on the axoneme-facing side and  
15 to cargoes on the membrane-facing side facilitate lateral transport through the transition zone.

16 Thus, in contrast to all other known diffusion barriers, the transition zone is a porous barrier that  
17 allows the selective permeation of GPCRs bound to BBSome/Arl6 coats. Physical and genetic  
18 interactions between the BBSome and transition zone proteins such as Cep290 (Yee et al., 2015;  
19 Goetz et al., 2017; Zhang et al., 2014; Barbelanne et al., 2015) are in agreement with a general  
20 model where BBSome/Arl6 coats contact the transition zone during crossing. Taking our data  
21 into account, we propose that Arl6-GTP increases the coupling between cargoes, BBSome and  
22 IFT trains to facilitate lateral transport through the transition zone. However, the intimate details  
23 of transition zone crossing remain to be determined. In particular, the lack of precedent for  
24 selective permeation through a membrane diffusion barrier points to distinguishing biophysical

- 2 features of the transition zone whose definition promises to enrich the concepts underlying
- 3 diffusion barriers.

## 2 **Materials and Methods**

### 3 Cell line construction

4 For all experiments, a mouse inner medullar collecting duct IMCD3-FlpIn cell line was  
5 used (gift from Peter K. Jackson). IMCD3-FlpIn cells were cultured in DMEM/F12 (Cat.  
6 #11330-057, Gibco) supplemented with 5% FBS, 100 U/mL penicillin-streptomycin, and 2 mM  
7 L-glutamine.

8 Cell lines expressing SSTR3, GPR161, BBS1, BBS5, and IFT88 were generated using the  
9 FlpIn System (ThermoFisher Scientific). Construction of multiple expression cassettes with low-  
10 expression promoters was conducted as described (Nager et al., 2017). Coding sequences were  
11 amplified from plasmids encoding human BBS1 and BBS5 (gifts from Val Sheffield), BirA-ER  
12 (gift from Alice Ting (Howarth and Ting, 2008), Addgene plasmid # 20856), mouse GPR161  
13 (BC028163, MGC, Dharmacon), human NPY2R (BC075052, MGC, Dharmacon), mouse IFT88  
14 (IOM20300, UltimateORF, Invitrogen), human MCHR1 (BC001736, MGC, Dharmacon), PACT  
15 (Pericentrin and AKAP450 centrosome-targeting domain, gift from Sean Munro (Gillingham and  
16 Munro, 2000)), mouse Kif7 (gift from Kathryn Anderson (He et al., 2014, 7)), and mouse SSTR3  
17 (gift from Kirk Mykytyn). BBS1, BBS5, and IFT88 were expressed by the EF1 $\alpha$  promoter;  
18 SSTR3, NPY2R and MCHR1 the EF1 $\alpha^{\Delta}$  promoter, and GPR161 by the Crys promoter. Green  
19 Fluorescent Protein (GFP), NeonGreen (NG) (Shaner et al., 2013), mScarlet (Bindels et al.,  
20 2017) (Addgene #85042), and TandemTomato (tdTomato) (Gift from Michael Davidson (Shaner  
21 et al., 2004), Addgene #54653) and an acceptor peptide (GLNDIFEAQKIEWHE) for the biotin  
22 ligase BirA (AP) were used in fusion proteins. Kif7 cDNA was subcloned into a modified  
23 pCMV-based plasmid (pmScarlet-C, Addgene #85042) that was transfected into IMCD3 cells  
24 using Lipofectamine 2000, and clones were selected using Neomycin resistance. The expression

2 level of <sup>NG3</sup>BBS5 and <sup>NG3</sup>IFT88 relative to endogenous BBS5 and IFT88 were determined by  
3 western blotting (Fig. **3A** and **S2I**), the expression levels of exogenous SSTR3 or GPR161  
4 compared to endogenous GPCRs were determined by measuring the intensity of ciliary  
5 fluorescence after immunostaining (Fig. **1C** and **S1B**).

6 CRISPR-based genome editing was done by transiently expressing Cas9 and guide RNAs  
7 (pX330, Addgene #42230, Feng Zhang). Knockouts of *Arl6* and *Ift27* are described (Liew et al.,  
8 2014), the guide sequences used were AAGCCGCGATATGGGCTTGC for *Arl6* and  
9 GGAAATGGGTCCCGTCGCTG for *Ift27*. Knockouts of *Arb1* and *Arb2* are described (Nager  
10 et al., 2017), the guide sequences used were

11 ACTCACCCACGGGGTCCACG for *Arb1* and TCTAGGCAAACCTTACCCACA for  
12 *Arb2*. To generate a *Tulp3*<sup>-/-</sup> cell line, a guide RNA targeting the sequence  
13 ACGTCGCTGCGAGGCATCTG was used. CRISPR-modified clones were isolated by limited  
14 dilution, and verified by western blotting for the disrupted gene product. To confirm gene  
15 editing, the modified genomic locus was isolated used using the ThermoFisher CloneJET PCR  
16 cloning kit (Cat. #K1231, ThermoFisher Scientific).

17

### 18 Low Expression Promoters

19 Cloning of constructs with low expression promoters was done as described (Nager et al.,  
20 2017). Briefly, an *NsiI* restriction cloning site was inserted by site directed mutagenesis before  
21 the EF1 $\alpha$  promoter in pEF5B/FRT (Nager et al., 2017). The EF1 $\alpha$  promoter was then excised by  
22 *NsiI* and *SpeI*, and replaced by either the UbC, thymidine kinase (TK), EF1 $\alpha^{\Delta}$ , CMV $\Delta$ , or a  
23 minimal chicken lens  $\delta$ -crystallin promoter (Morita et al., 2012; Ferreira et al., 2011; Kamachi  
24 and Kondoh, 1993). The UbC promoter was cloned from pLenti6/UbC/V5-Dest (Cat. #V49910,



2 ThermoFisher Scientific). The thymidine kinase promoter was from pRL TK (Cat. #E2241,  
3 Promega). EF1 $\alpha^{\Delta}$  consists of a TATA-less EF1 $\alpha$  promoter from pEF5/FRT/V5-Dest (Cat.  
4 #V602020, ThermoFisher Scientific) wherein the TATA box sequence, TATAA, was mutated to  
5 TCCCC. CMV $\Delta$  was designed after the CMV( $\Delta$ 6) promoter (Morita et al., 2012), and was cloned  
6 from pcDNA3.1 (Cat. #V79020, ThermoFisher Scientific). The chicken lens  $\delta$ -crystallin  
7 promoter was cloned from a pGL3-8xGli-Firefly-Luciferase plasmid (gift from Phil Beachy).

### 8 9 Hippocampal Neurons

10 Rat hippocampal neurons were dissected from postnatal day 0 or 1 rat pups and plated on  
11 poly-D-lysine-coated 12 mm #0 cover glass. Neurons were cultured in Neurobasal medium with  
12 serum-free B27 (Cat. #21103049, ThermoFisher Scientific) and Gibco GlutaMAX (Cat.  
13 #35050061, ThermoFisher Scientific) . Neurons were identified by nuclear NeuN staining in  
14 immunofluorescence studies.

### 15 16 Transfection

17 Plasmids were reverse-transfected by Lipofectamine 2000 (Cat. #11668027, ThermoFisher  
18 Scientific). Briefly, detached cells were plated with the transfection reagent and plasmid in  
19 Optimem (Cat. #31985070, ThermoFisher Scientific). The transfection reagent was replaced by  
20 fresh DMEM/F12 medium after 4 hr. siRNAs were reverse-transfected by Lipofectamine  
21 RNAiMAX (Cat. # 13778030, ThermoFisher Scientific). Briefly, detached cells were plated with  
22 the transfection reagent and the siRNA duplex in Optimem. Cells were then grown for 48 h  
23 before 24 h starvation and subsequent imaging. Control (Cat. #D-001210-04-05), BBS1 (Cat.  
24 #D-019180-03), BBS2 (Cat. #D-010080-02) and BBS4 (Cat. #D-054691-03) were from

2 Dharmacon, and the Kif7 siRNA (Cat. #GS16576) and matched control (Cat. #1027280) were  
3 from Qiagen. siRNA targeting Arl6 (CTTTAGGACTTGAGACATT) was described (Jin et al.,  
4 2010).

## 6 Pharmacology

7 Small molecules were added at the following concentrations and for the indicated pre-  
8 treatment times unless otherwise indicated: ACQ090 (20  $\mu$ M, gift from Novartis (Bänziger et al.,  
9 2003)), IBMX (500  $\mu$ M, 30 min pre-incubation, Cat. # I5879, Sigma-Aldrich), L796,778 (10  
10  $\mu$ M, gift from Merck (Rohrer et al., 1998),), PKI (50  $\mu$ M, 40 min pre-incubation, Cat. BML-  
11 P210-0500, Enzo Life Sciences), PTX (10 ng/mL, 16 h pre-incubation, Cat. #180, List  
12 Biological Laboratories), Rp-cAMPS (10  $\mu$ M, 2 h pre-incubation, Cat. #sc-24010, Santa Cruz),  
13 SAG (200 nM, ALX-270-426-M001, Enzo Life Sciences), Somatostatin (10  $\mu$ M, Cat.#ASR-003,  
14 Alomone Labs), SQ22536 (500  $\mu$ M, 40 min pre-incubation. Cat. #S153, Sigma-Aldrich).

## 16 Antibodies and Affinity Reagents

17 The following antibodies were used: AC3 (sc-588, Santa Cruz Biotechnology), acetylated  
18 tubulin (Clone 6-11B-1, Sigma-Aldrich), Arl6 (Jin et al.; 2010),  $\beta$ -Arrestin1 (Cat. #15361-1-AP,  
19 Proteintech Group),  $\beta$ -Arrestin2 (Cat. #10171-1-AP, Proteintech Group), BBS5 (Cat. #14569-1-  
20 AP, Proteintech Group), BBS9 (Cat. #HPA021289, Sigma-Aldrich), Centrin (Clone 20H5,  
21 Millipore), Cep164 (gift from Tim Stearns), Cep290 (gift from Sophie Saunier), c-Myc (Cat.  
22 #sc-40, Santa Cruz Biotechnology), GFP (Cat. #A11122, Invitrogen), GPR161 (gift from Saikat  
23 Mukhopadhyay), IFT139 (gift from Pamela Tran), IFT140 (Cat. #17460-1-AP, Proteintech  
24 Group), NeuN (Cat. #MAB377, Millipore), Ninein (gift from Michel Bornens), Phospho-p44/42

2 MAPK Erk1/2 Thr202/Tyr204 (Cat. #4370, Cell Signaling Technologies), SSTR3 (Cat. #sc-  
3 11617, Santa Cruz Biotechnology), and TULP3 (gift from John Eggenschwiler). Biotinylated  
4 SSTR3 and GPR161 were detected using Alexa647-labeled monovalent streptavidin (Ye et al.,  
5 2013).

### 7 Protein-Protein Interaction Assays

8 IFT-A was purified through a LAP tag on the N-terminus of IFT43 as described (Nachury,  
9 2008). Briefly, IMCD3-[pEF1 $\alpha$ -<sup>LAP</sup>IFT43] were harvested and lysed, and the IFT-A complex  
10 was captured by GFP immunoaffinity and eluted with the TEV protease. GST and GST-SSTR<sup>i3</sup>  
11 fusion proteins were purified from *E.coli*, and used for interaction assays as described (Jin et al.,  
12 2010).

13 The interaction of <sup>GFP</sup>Kif7 with <sup>Myc</sup>BBS1 was assayed by co-transfection/co-IP. HEK293  
14 cells were forward transfected in a 6-cm plate with plasmids expressing <sup>GFP</sup>Kif7 and either  
15 <sup>Myc</sup>RFP or a Myc-tagged BBSome subunit. After two days, cells were washed and treated with  
16 media containing either IBMX or DMSO for 30 min. Cells were then trypsinized, pelleted and  
17 cleaned in a flacon tube, and lysed for 10 min with cold CoIP buffer (50 mM Tris pH 7.4, 150  
18 mM NaCl, 1% Triton X-100, 1 mM DTT, 1 mM AEBSF, 800 nM Aprotinin, 15  $\mu$ M E-64, 10  
19 mg/ml Leupeptin, 10 mg/ml Pepstatin A, 10 mg/ml Bestatin). The resulting lysates were then  
20 centrifuged for 15 min, concentration-matched, and then added to anti-GFP antibody coupled  
21 beads in CoIP buffer. The beads were rotated for 20 min at 4°C, pelleted and washed with CoIP  
22 buffer 4 times, and eluted by boiling in SDS-PAGE loading buffer.

### 24 Absolute quantitation of cilia-localized proteins

2 In Fig. **1C**, the number of  $^{AP}SSTR3^{GFP}$  molecules per cilium resulting from expression  
3 driven by the EF1 $\alpha$ , UBC, TK, EF1 $\alpha^{\Delta}$ , and CMV $^{\Delta}$  promoters was estimated by comparison to a  
4 viral particle containing exactly 120 GFP molecules (Breslow et al., 2013). As ciliary GFP was  
5 not detectable by direct imaging of the IMCD3-[pCrys- $^{AP}SSTR3^{GFP}$ ] line, immunostaining for  
6 GFP was used to amplify the fluorescent signal and compare to immunostained GFP in IMCD3-  
7 [pEF1 $\alpha^{\Delta}$ -SSTR3 $^{GFP}$ ] cells. To estimate the number of SSTR3 molecules per hippocampal  
8 neuron, hippocampal neurons and IMCD3-[ $^{AP}SSTR3^{GFP}$ ] cells using the aforementioned  
9 promoters were compared by SSTR3 immunostaining. The epitope recognized by the SSTR3  
10 antibody (Cat. #sc-11617, Santa Cruz Biotechnology) is identical between rat and mouse (Santa  
11 Cruz Biotechnology, personal communication).

12 For quantitation of NeonGreen-tagged proteins including  $^{AP}SSTR3^{NG}$ ,  $^{AP}GPR161^{NG3}$ ,  
13  $^{NG3}BBS5$ , and  $^{NG3}IFT88$ , ciliary molecules were quantified using single NeonGreen trimers  
14 (NG3) as a calibrator (Prevo et al., 2015). NG3 protein was recombinantly expressed in *E. coli*,  
15 and purified by nickel affinity. The purified protein was then sparsely immobilized on a 18x18  
16 mm coverslip for imaging on a DeltaVision microscope. Imaging was done in Invitrogen Live  
17 Cell Imaging Solution (Cat. #A14291DJ). To confirm that fluorescent foci originate from a  
18 single NG3, we confirmed that fluorescence was lost by photobleaching in three discrete steps  
19 (Fig. **1E**, **S1H**). The mean fluorescent intensity from over 1257 molecules was then used to  
20 estimate the number of NeonGreen-tagged molecules in cilia.

21  
22 To quantify the absolute number of ciliary proteins, serum staved live IMCD3 cells were  
23 imaged in Invitrogen Live Cell Imaging Solution (Cat. #A14291DJ) with the same exposure  
24 setting as used in single NG3 fluorescent quantitation. Therefore,

2

$$3 \quad N_{\text{cilia}} = (F_{\text{cilia\_NG}} - F_{\text{background}}) / ((F_{\text{NG3}} / n) * R_{\text{expression}})$$

4

5       Where  $N_{\text{cilia}}$  is the absolute number of ciliary protein,  $F_{\text{cilia\_NG}}$  is the total ciliary  
6 fluorescence detected from NG or NG3 labeled proteins,  $F_{\text{background}}$  is the background  
7 fluorescence measured in the adjacent area.  $F_{\text{NG3}}$  is the fluorescent intensity of a single NG3  
8 protein,  $n$  determined by the single or triple NG tag was used. For example,  $n = 3$  for  $^{\text{AP}}\text{SSTR3}^{\text{NG}}$   
9 and  $n=1$  for  $\text{GPR161}^{\text{NG3}}$ .  $R_{\text{expression}}$  is the abundance ratio between the NeonGreen-tagged form of  
10 a given protein and the total amount of that protein in cilia. For  $\text{pEF1}\alpha\text{-}^{\text{NG3}}\text{BBS5}$  and  $\text{pEF1}\alpha\text{-}$   
11  $^{\text{NG3}}\text{IFT88}$ ,  $R_{\text{expression}} = 0.55$  and  $0.51$  respectively, which were measured by western blotting (Fig.  
12 **3A** and **S2I**). For  $\text{pEF1}\alpha\text{-}^{\text{AP}}\text{SSTR3}^{\text{NG}}$ ,  $R_{\text{expression}} = 1$  since IMCD3 cells do not express SSTR3.  
13 For  $^{\text{AP}}\text{GPR161}^{\text{NG3}}$ ,  $R_{\text{expression}}$  could not be directly measured because tagging of GPR161 at the  
14 C-terminus (e.g. in  $\text{GPR161}^{\text{NG3}}$ ) interferes with recognition by the anti-GPR161 antibody  
15 developed by Mukhopadhyay and colleagues (Mukhopadhyay et al., 2013). We thus utilized  
16  $^{\text{AP}}\text{GPR161}$  as an intermediate calibrator between  $^{\text{AP}}\text{GPR161}^{\text{NG3}}$  and endogenous GPR161. A  
17 plasmid encoding  $\text{pCrys-}^{\text{AP}}\text{GPR161}$  was transfected into IMCD3 cells and the relative expression  
18 levels of transiently expressed  $^{\text{AP}}\text{GPR161}$  and stably expressed  $^{\text{AP}}\text{GPR161}^{\text{NG3}}$  were measured by  
19 mSA647 pulse-labeling.

20

$$21 \quad R_{\text{AP.GPR161.NG3:AP.GPR161}} = F_{\text{mSA.Gpr161.NG3}} / F_{\text{mSA.GPR161}}$$

22

23       Where  $R_{\text{AP.GPR161.NG3:AP.GPR161}}$  is the ratio between stably expressed  $^{\text{AP}}\text{GPR161}^{\text{NG3}}$  and  
24 transiently expressed  $^{\text{AP}}\text{GPR161}$  in cilia,  $F_{\text{mSA.GPR161}}$  is the ciliary fluorescence signal measured

2 by mSA647 labeling of transiently expressed <sup>AP</sup>GPR161, and  $F_{\text{mSA.Gpr161.NG3}}$  is the ciliary  
3 fluorescence signal measured by mSA647 labeling of stably expressed <sup>AP</sup>GPR161.

4  
5 The relative ciliary expression levels of endogenous GPR161 and <sup>AP</sup>GPR161 were  
6 measured by anti-GPR161 antibody.

7  
8 
$$R_{\text{endoGPR161:AP.GPR161}} = F_{\text{Ab}} / (F_{\text{Ab+AP.GPR161}} - F_{\text{Ab}})$$

9  
10 Where  $R_{\text{endoGPR161:AP.GPR161}}$  is the ratio between endogenous GPR161 and transiently  
11 expressed <sup>AP</sup>GPR161 in cilia,  $F_{\text{Ab}}$  is the ciliary fluorescence signal measured by  
12 immunofluorescence of untransfected cells with the anti-GPR161 antibody and  $F_{\text{Ab+AP.GPR161}}$  is  
13 the ciliary fluorescence signal measured by immunofluorescence of cells transiently expressing  
14 with <sup>AP</sup>GPR161 with the anti-GPR161 antibody.

15  
16 Therefore,

17  
18 
$$N_{\text{AP.GPR161.NG3}} = (F_{\text{cilia.NG}} - F_{\text{background}}) / F_{\text{NG3}}$$

19  
20 
$$R_{\text{endoGPR161:AP.GPR161.NG3}} = R_{\text{endoGPR161:AP.GPR161}} / R_{\text{AP.GPR161.NG3:AP.GPR161}}$$

21  
22 
$$N_{\text{endoGPR161}} = N_{\text{AP.GPR161.NG3}} / R_{\text{endoGPR161:AP.GPR161.NG3}}$$

23  
24 
$$R_{\text{expression}} = N_{\text{AP.GPR161.NG3}} / (N_{\text{AP.GPR161.NG3}} + N_{\text{endoGPR161}})$$

2

3       Where  $R_{\text{endoGPR161:AP.GPR161.NG3}}$  is the ciliary abundance ratio between endogenous GPR161  
4 and stably expressed  $^{\text{AP}}\text{GPR161}^{\text{NG3}}$ ;  $N_{\text{endoGPR161}}$  and  $N_{\text{AP.GPR161.NG3}}$  are the absolute number of  
5 endogenous GPR161 and stably expressed  $^{\text{AP}}\text{GPR161}^{\text{NG3}}$  in cilia;  $F_{\text{cilia\_NG}}$  is the total ciliary  
6 fluorescence detected in the green channel from  $^{\text{AP}}\text{GPR161}^{\text{NG3}}$ ;  $F_{\text{background}}$  is the background  
7 fluorescence measured in the adjacent area;  $F_{\text{NG3}}$  is the fluorescent intensity of a single NG3  
8 protein;  $R_{\text{expression}}$  is the ciliary abundance ratio between stably expressed  $^{\text{AP}}\text{GPR161}^{\text{NG3}}$  and total  
9 GPR161. Using the above strategy, we determined that:

10

$$11 \quad N_{\text{AP.GPR161.NG3}} = 1226$$

12

$$13 \quad N_{\text{endoGPR161}} = 949$$

14

$$15 \quad R_{\text{expression}} = 0.56$$

16

### 17 Bulk GPCR Exit Assays

18       Bulk measurements of GPCR exit were done as described previously (Nager et al., 2017).  
19 Briefly, to measure SSTR3 exit, cell expressing  $^{\text{AP}}\text{SSTR3}^{\text{NG}}$  were firstly washed three times with  
20 PBS containing 5 mM  $\text{MgCl}_2$  (PBS-Mg) and then pulse-labeled with Alexa647-labeled mSA  
21 (mSA647) for 5-10 min. To remove the unbound mSA647, cells were washed three times with  
22 PBS containing 5 mM  $\text{MgCl}_2$  and imaged on a DeltaVision microscope following addition of  
23 somatostatin. For each time point, the integrated Alexa647 fluorescence density was measured

2 using ImageJ. The cilia-adjacent fluorescence was subtracted as the background, and a  
3 mathematical photobleaching correction was applied:

4

$$5 \quad F_{\text{cilia}} = (F_{\text{SA647\_measured}} / F_{\text{SA647\_1}}) + (1 - e^{-\lambda * (n-1)})$$

6

7 Where  $\lambda$  is the photobleaching decay constant,  $n$  is the number of images taken,

8  $F_{\text{SA647\_measured}}$  is the integrated SA647 fluorescence measured for image 'n',  $F_{\text{SA647\_1}}$  is the

9 measurement for the first time point, and  $F_{\text{cilia}}$  is the reported fluorescence. In this equation,  $F_{\text{cilia}}$

10 is reported in Relative Fluorescence Units (RFUs).

11

12  $^{\text{AP}}\text{GPR161}^{\text{3NG}}$  was assayed similarly except that quantitations were done by NG

13 fluorescence intensity using the following equation:

14

$$15 \quad \text{GPR161}_{\text{cilia}} = (F_{\text{NG3\_n}} / F_{\text{NG3\_1}}) * (\mu_{\text{F\_NG3\_Cilia}} * \mu_{\text{F\_NG3}})$$

16

17 Where  $\text{GPR161}_{\text{cilia}}$  is the number of GPR161 molecules in the cilium,  $F_{\text{NG3\_n}}$  is the

18 photobleaching-corrected integrated NG fluorescence measured for image 'n',  $F_{\text{NG3\_1}}$  is the

19 measurement for the first time point,  $\mu_{\text{F\_NG3\_Cilia}}$  is the mean integrated NG fluorescence from a

20 population of  $^{\text{AP}}\text{GPR161}^{\text{3NG}}$  cilia, and  $\mu_{\text{F\_NG3}}$  is the mean integrated green fluorescence from

21 individual NG3 molecules.

22

23 To measure the exit rate of SSTR3 and GPR161 in the first 2h after adding agonist (Fig **1F-**

24 **G**),



2

$$3 \quad R_{\text{exit/h}} = N_{\text{cilia}} * (F_{\text{cilia}_1} - F_{\text{cilia}_{2h}}) / (2 * F_{\text{cilia}_1})$$

4

5       Where  $R_{\text{exit/h}}$  is the number of SSTR3 or GPR161 that exited cilia per hour,  $F_{\text{cilia}_1}$  is the  
6 background corrected ciliary fluorescent intensity before adding agonist,  $F_{\text{cilia}_{2h}}$  is the  
7 background corrected ciliary fluorescent intensity after 2h of agonist treatment,  $N_{\text{cilia}}$  is the  
8 absolute number of SSTR3 or GPR161 molecules in cilia as described in previous section.

9

10       To assess significant differences in GPCR removal, we used multiple regression. First, raw  
11 data was linearly fitted ( $F_{\text{cilia}} = m * \text{time} + c$ ). Conditions were then compared using a z-statistic:

12

$$13 \quad z = (m_1 - m_2) / (se_{1,2})$$

14

15       Where  $m_1$  and  $m_2$  are the fitted slopes for two experiments, and  $se_{1,2}$  is the propagated  
16 standard error of the slopes:

17

$$18 \quad se_{1,2} = \text{sqrt}(s_{m1}^2 + s_{m2}^2)$$

19

20       Where  $s_{m1}$  and  $s_{m2}$  are the standard deviations for  $m_1$  and  $m_2$ , respectively. Z-statistics were  
21 converted to p-values for statistical interpretation.

22

23       Fixed Imaging

2           In a 24-well plate, 50,000 to 100,000 cells were seeded on Fisherbrand acid-washed cover  
3 glass (12 mm #1.5, Cat. #12-545-81, Fisher Scientific). Cells were grown for 24 h, and then  
4 starved for 16-24 h in 0.2% FBS media prior to experimental treatment. After treatment, cells  
5 were fixed with room-temperature 4% paraformaldehyde in phosphate buffer saline (PBS) for 5  
6 min, extracted in -20°C methanol for 5 min, permeabilized in PBS containing 0.1% Triton-X100,  
7 5% normal donkey serum (017-000-121, Jackson Immunoresearch Labs), and 3% bovine serum  
8 albumin (BP1605-100, ThermoFisher Scientific) for 30 min, and subsequently immunolabeled  
9 for imaging. Briefly, cells were incubated with primary antibodies for 1 h, washed three times  
10 with PBS, incubated with dye-coupled secondary antibodies (Jackson Immunoresearch Labs) for  
11 30 min, washed two times with PBS, stained with Hoechst DNA dye, washed twice more with  
12 PBS, and mounted on slides using Fluoromount-G (Cat. #17984-25, Electron Microscopy  
13 Sciences). Cells were then imaged on a DeltaVision system. In most experiments, cilia closest to  
14 the cover slip were imaged (ventral cilia) as these cilia often lay perpendicular to the objective  
15 and within a single focal plan. In select cases, cilia pointing away from the coverslip (dorsal  
16 cilia) were imaged as to reduce background fluorescence. To do so, a Z-stack of images with 0.3-  
17 µm separation was collected and deconvolved using SoftWoRx 6.0.

18

### 19 Live-Cell Imaging

20           400,000 cells were seeded on acid-washed 25 mm cover glass (Cat. #72223, Electron  
21 Microscopy Sciences) in a 6 cm dish. After 24 h of growth, cells were starved for 16 h and  
22 transferred to the DeltaVision stage for imaging at 37 °C inside an environmental chamber. Cells  
23 were imaged in DMEM/F12 media, with HEPES and no phenol red and 0.2% FBS (Cat. #11039-  
24 021, Gibco). For all >1 h imaging experiments, the imaging chamber was overlaid with a petri

2 dish containing a moist towel to maintain the imaging volume and pH. To accurately measure  
3 removal of <sup>AP</sup>SSTR3<sup>NG</sup>, the biotinylated AP tag of SSTR3 was pulse-labeled with Alexa647-  
4 labeled monovalent streptavidin (SA647) for 5 min as described (Ye et al., 2013).

5 All imaging was conducted on an Applied Precision DeltaVision equipped with a  
6 PlanApo 60×/1.40 numerical aperture (NA) oil objective lens and a PlanApo 60×/1.49 NA total  
7 internal reflection microscopy (TIRF) oil objective lens (Olympus) and a 488 nm laser from  
8 DeltaVision Quantifiable Laser Module (QLM), and images were captured with a pco.edge  
9 sCMOS camera (PCO) with near-perfect linearity across its 15 bit dynamic range. The pixel size  
10 of the sCMOS camera is 0.1077 μm.

#### 12 Kymograph Analysis and Processivity

13 To analyze intraciliary trafficking, IFT88 and BBS5 proteins were genetically labeled with  
14 NG3 and rapidly imaged with TIRF (4 Hz) for short time periods (30-60 s). TIRF illumination  
15 reduced nonciliary (background) fluorescence, permitting visualization of dim trains. The  
16 resulting movies were analyzed by ImageJ for generating kymographs. KymographClear and  
17 KymographDirect (Mangeol et al., 2016) were used to deconvolve anterograde from retrograde  
18 trains for measuring relative intensities for BBSome trains whereas Multi Kymograph was used  
19 for unaltered presentation (e.g. Fig. 6A).

20 The processivity of IFT-B or BBSome trains along axonemal microtubules was defined as  
21 the duration for which a fluorescent focus of IFT88 or BBS5 unidirectionally moved along the  
22 the cilium at a rate expected for kinesin or dynein-mediated transport (0.3-0.6 μm/s). Only events  
23 occurring for longer than 3 seconds were considered. Measurements were made from  
24 kymographs of <sup>NG3</sup>IFT88, <sup>NG3</sup>BBS5, or <sup>tdTomato</sup>IFT88 and <sup>NG3</sup>BBS5. Briefly, kymographs were

2 visualized in ImageJ, and lines were drawn along the long axis of the cilium (“the leg”) and the  
3 processive movement (“the hypotenuse”). The angle between the leg and the hypotenuse was  
4 measured (“the included angle”). Comparison of the leg and the hypotenuse was used to quantify  
5 the processivity of a IFT or BBS-containing train. Comparison of the hypotenuse and the  
6 included angle was used to measure the velocity of IFT and BBS trains.

7

### 8 Quantitation of IFT/BBS trains

9 To estimate the number of IFT88 or BBS5 molecules per train, the total NG3 fluorescence  
10 along the ciliary axoneme was first divided by the number of trains:

11

$$12 \quad T_{\text{RFU\_mean}} = \mu_{\text{RFU\_NG3\_axoneme}} / N_{\text{train}}$$

13

14 Where  $T_{\text{RFU\_mean}}$  is the estimated  $^{\text{NG3}}$ IFT88 or  $^{\text{NG3}}$ BBS5 fluorescence of a single train,  
15  $\mu_{\text{RFU\_NG3\_axoneme}}$  is the mean integrated fluorescence along the axonemes of several cilia  
16 (excluding the base and the tip), and  $N_{\text{train}}$  is the number of trains counted by kymograph analysis  
17 in the cilia when  $\mu_{\text{RFU\_NG3\_axoneme}}$  was measured. To increase measurement precision for  
18 calculating  $\mu_{\text{RFU\_NG3\_axoneme}}$ , cilia were imaged by epifluorescence rather than TIRF illumination  
19 as the TIRF field did not reproducibly illuminate cilia from different cells.  $T_{\text{RFU\_mean}}$  was then  
20 used to calculate the absolute number of IFT88 or BBS5 molecules per train by using the NG3  
21 standard described above (see “Absolute quantitation of cilia-localized markers”):

22

$$23 \quad T_{\text{labeled\_abs}} = T_{\text{RFU\_average}} / \mu_{\text{F\_NG3}}$$

24

2       Where  $T_{\text{labeled\_abs}}$  is the average number of labeled molecules per train, and  $\mu_{F\_NG3}$  is the  
3       previously-measured mean fluorescence of a single NG3. As  $T_{\text{labeled\_abs}}$  does not account for  
4       unlabeled IFT88 or BBS5 within a train, a correction must be applied that relates the ratio of  
5       unlabeled to labeled molecules in the cell:

$$7 \quad T_{\text{abs}} = T_{\text{labeled\_abs}} * ((W_{\text{NG3}} + W_{\text{endogenous}}) / W_{\text{NG3}})$$

8  
9       Where  $T_{\text{abs}}$  is the number of IFT88 or BBS5 molecules per train, and  $W_{\text{NG3}}$  and  $W_{\text{endogenous}}$   
10      are the integrated intensities of western blot bands for NG3-tagged and endogenous molecules  
11      using antibodies against mouse IFT88 or BBS5 (Fig. **3A** and **S2I**).  $T_{\text{abs}}$  was used to calculate the  
12      number of molecules in an anterograde ( $T_{\text{abs\_anterograde}}$ ) versus retrograde ( $T_{\text{abs\_retrograde}}$ ) train:

$$14 \quad T_{\text{abs}} = (f_{\text{anterograde}} * T_{\text{abs\_anterograde}} + f_{\text{retrograde}} * T_{\text{abs\_retrograde}}) / (f_{\text{anterograde}} + f_{\text{retrograde}})$$

15  
16      Where  $f_{\text{anterograde}}$  and  $f_{\text{retrograde}}$  are the frequency of either anterograde or retrograde trains.  
17      Using KymographClear analysis on <sup>NG3</sup>IFT88, we measure  $f_{\text{anterograde}} = 21.4$  trains/min and  
18       $f_{\text{retrograde}} = 18.5$  trains/min.  $T_{\text{abs\_anterograde}}$  and  $T_{\text{abs\_retrograde}}$  can now be solved using the size ratio  
19      ( $R_T$ ) of anterograde versus retrograde trains:

$$21 \quad R_T = \mu_{\text{RFU}_T\text{\_anterograde}} / \mu_{\text{RFU}_T\text{\_retrograde}}$$

22

2           Where  $\mu_{\text{RFU}_T\text{anterograde}}$  and  $\mu_{\text{RFU}_T\text{retrograde}}$  are the mean NG3 intensity of anterograde or  
3 retrograde trains. By KymographClear analyses,  $R_T = 1.69$  for  $\text{NG3IFT88}$ , and  $R_T = 1.78$  for  
4  $\text{NG3BBS5}$ . Relating  $T_{\text{abs\_anterograde}}$  to  $T_{\text{abs\_retrograde}}$ :

5

$$6 \quad T_{\text{abs\_anterograde}} = T_{\text{abs\_retrograde}} * R_T$$

7

8           One can calculate the number of IFT88/BBS5 particles in anterograde and retrograde trains:

9

$$10 \quad T_{\text{abs\_anterograde}} = (f_{\text{anterograde}} + f_{\text{retrograde}}) * T_{\text{abs}} / (f_{\text{anterograde}} + f_{\text{retrograde}} / R_T)$$

$$11 \quad T_{\text{abs\_retrograde}} = (f_{\text{anterograde}} + f_{\text{retrograde}}) * T_{\text{abs}} / (f_{\text{anterograde}} * R_T + f_{\text{retrograde}})$$

12

### 13 Linescan and tipping quantitation

14           The longitudinal fluorescence intensities of BBS5, IFT88, SSTR3 and GPR161 were  
15 measured in ImageJ by a Plot Profile of a 5-pixel-wide line along the long axis of the cilium. To  
16 average data from multiple cilia, pixel Intensities were assigned a length-percent with 0%  
17 referring to the base, and 100% referring to the tip. Values were then grouped into 5% bins and  
18 averaged. Bin means were then averaged across multiple cilia and plotted (e.g. Fig. **3B**).

19           To quantify  $\text{NG3BBS5}$  tipping, a 5x7 pixel box was centered at the cilium tip, and the  
20 integrated fluorescence intensity within the box was measured by ImageJ. The resulting values  
21 were background corrected by subtracting the fluorescence immediately adjacent to the cilium.  
22 The values from multiple ciliary tips were averaged, and then converted to absolute numbers of  
23 BBS5 particles using the NG3 calibration.

24

## 2 Single-molecule labeling with <sup>SA</sup>Qdot

3 Molecules of SSTR3 or GPR161 present on the surface of IMCD3-[pEF1 $\alpha^{\Delta}$ -<sup>AP</sup>SSTR3<sup>NG3</sup>]  
4 and IMCD3-[pCrys-<sup>AP</sup>GPR161<sup>NG3</sup>] cells were labeled with <sup>SA</sup>Qdot through the affinity of  
5 streptavidin for the extracellular biotinylated AP tag. Both cells lines express an ER-targeted  
6 BirA ligase that biotinylates the N-terminal AP tag of each GPCR (Nager et al., 2017; Howarth  
7 and Ting, 2008). Single GPCR labeling was achieved through a blocking strategy. First, to block  
8 surface-exposed biotinylated receptors, cells were washed with PBS (3 times), and then  
9 incubated with 10 nM mSA for 15 min. Cells were washed with PBS (3 times), and incubated  
10 with 1 nM <sup>SA</sup>Qdot (Cat. #Q10123MP, ThermoFisher Scientific) solution for 15 min. As the  
11 <sup>SA</sup>Qdot only binds to receptors newly arrived at the surface during the 15 min of labeling, this  
12 approach labels very few receptors. Lastly, cells were washed with PBS (3 times), and  
13 transferred to imaging media (DMEM/F12, HEPES, no phenol red media; Cat. #11039-021,  
14 Gibco) with 0.2% FBS and 1  $\mu$ M biotin to block unbound Streptavidin on <sup>SA</sup>Qdot.

15 Qdot-labeled SSTR3 and GPR161 molecules exited the cilium at rates congruent with bulk  
16 imaging (Fig. **1F-G**). By counting the number of <sup>QD</sup>SSTR3 per cilia after 2 h treatment with  
17 vehicle or sst (Fig. **8C**), we determined that sst treatment resulted in the loss of 25% of cilia-  
18 localized Qdots, consistent with the SSTR3 exit rate measured by bulk fluorescence (Fig. **1F**).  
19 As a second test, the frequencies of <sup>QD</sup>GPR161 exit events captured by live imaging matched the  
20 frequencies predicted from imaging the decrease in bulk fluorescence of GPR161<sup>NG3</sup> (Fig. **S5B**).

21

## 22 Qdot localization and analysis

23 To monitor single receptor trafficking, cilia bearing one Qdot were imaged on the  
24 Deltavision microscope at 2 Hz for 5 to 20 min. Cilia were identified by the NG signal from the

2 C-terminal NG and NG3 tags. The centroid of <sup>SA</sup>QD-labeled single SSTR3 and GPR161 were  
3 mapped as described (Sage et al., 2005). The localization precision of Qdot was measured as  
4 described (Deschout et al., 2014).

5 Processivity, residence, and confinement frequencies are based on kymograph analyses  
6 (examples shown in Fig. **S4**). Processive <sup>QD</sup>GPCR movements were defined as consecutive  
7 frames where a Qdot moved longitudinally along the ciliary axoneme. To distinguish motor-  
8 driven from diffusive events, only processive motions that extend for at least 6 consecutive  
9 frames (Fig **S3G**) or 10 consecutive frames (Fig. **8F**) are plotted. Residence at the base and tip  
10 was operationally defined as residing at the basal or distal 10% length of the cilium for longer  
11 than 2.5 seconds (Fig. **8G**). As freely diffusing receptors occasionally remain at the cilia base or  
12 tip for more than 2.5 seconds, confinement was defined by a more stringent criterion of events  
13 lasting longer than 15 seconds (Fig. **8G**).

14 The most base-proximal position of <sup>QD</sup>GPR161 was mapped on a coordinate system  
15 established by the profile of ciliary GPR161<sup>NG3</sup> (Fig. **10A-C**). The same approach was applied to  
16 map the immunofluorescence intensity center of Cep290 and Cep164 (Fig. **10A-C**). Intermediate  
17 compartment visits were defined as events where the QDot centroid crossed the 50<sup>th</sup> percentile of  
18 NG intensity in the GPR161<sup>NG</sup> longitudinal scan profile (Fig. **10C and F**).

19

## 20 Box Plots

21 All box plots display the second, third, and fourth quartiles along with whiskers that  
22 represent values within the 1.5x the interquartile range. Outliers exceeding the whiskers are  
23 plotted as points.

24



2 Online supplemental material

3 Fig. **S1** shows that low-expression promoters recapitulate the physiological exit kinetics of  
4 SSTR3. Fig. **S2** identifies IFT-A/Tulp3 as the importer of GPCRs into cilia and BBSome/Arl6 as  
5 the exporter. Fig. **S3** presents BBSome and IFT train processivity and single molecule  
6 quantitation. Fig. **S4** shows kymographs of single molecules of <sup>QD</sup>SSTR3 and <sup>QD</sup>GPR161. Fig.  
7 **S5** shows visualization of <sup>QD</sup>GPR161 exit at single molecule resolution. Movie S1 shows  
8 somatostatin-dependent removal of SSTR3 from cilia. Movie S2 shows IFT-B foci movements  
9 in cilia. Movie S3 shows co-movement of BBSome and IFT-B. Movie S4 shows BBSome foci  
10 movement in cilia. Movie S5 shows dynamics of BBSome-mediated retrieval. Movie S6 shows  
11 behavior of Qdot-labeled SSTR3 in control-treated cells. Movie S7 shows behavior of Qdot-  
12 labeled SSTR3 in somatostatin-treated cells. Movie S8 shows direct observation of ciliary exit of  
13 Qdot-labeled GPR161.

## 2 References

- 3 Bangs, F., and K.V. Anderson. 2017. Primary Cilia and Mammalian Hedgehog Signaling. *Cold*  
4 *Spring Harb. Perspect. Biol.* 9:a028175. doi:10.1101/cshperspect.a028175.
- 5 Bänziger, M., J. Cercus, H. Hirt, K. Laumen, C. Malan, F. Spindler, F. Struber, and T. Troxler.  
6 2003. The development of a practical synthesis of the potent and selective somatostatin sst3  
7 receptor antagonist [4-(3,4-difluoro-phenyl)-piperazine-1-yl]-{(4S,4aS,8aR)-2[(S)-3-(6-  
8 methoxy-pyridin-3-yl)-2-methyl-propyl]-decahydroisoquinoline-4-yl}-methanone (NVP-  
9 ACQ090). *Tetrahedron Asymmetry.* 14:3469–3477. doi:10.1016/j.tetasy.2003.07.024.
- 10 Barbelanne, M., D. Hossain, D.P. Chan, J. Peränen, and W.Y. Tsang. 2015. Nephrocystin  
11 proteins NPHP5 and Cep290 regulate BBSome integrity, ciliary trafficking and cargo delivery.  
12 *Hum. Mol. Genet.* 24:2185–2200. doi:10.1093/hmg/ddu738.
- 13 Berbari, N.F., A.D. Johnson, J.S. Lewis, C.C. Askwith, and K. Mykityn. 2008a. Identification of  
14 Ciliary Localization Sequences within the Third Intracellular Loop of G Protein-coupled  
15 Receptors. *Mol. Biol. Cell.* 19:1540–1547. doi:10.1091/mbc.E07-09-0942.
- 16 Berbari, N.F., J.S. Lewis, G.A. Bishop, C.C. Askwith, and K. Mykityn. 2008b. Bardet–Biedl  
17 syndrome proteins are required for the localization of G protein-coupled receptors to primary  
18 cilia. *Proc. Natl. Acad. Sci.* 105:4242–4246. doi:10.1073/pnas.0711027105.
- 19 Bindels, D.S., L. Haarbosch, L. van Weeren, M. Postma, K.E. Wiese, M. Mastop, S. Aumonier,  
20 G. Gotthard, A. Royant, M.A. Hink, and T.W.J.G. Jr. 2017. mScarlet: a bright monomeric red  
21 fluorescent protein for cellular imaging. *Nat. Methods.* 14:53. doi:10.1038/nmeth.4074.
- 22 Breslow, D.K., E.F. Koslover, F. Seydel, A.J. Spakowitz, and M.V. Nachury. 2013. An in vitro  
23 assay for entry into cilia reveals unique properties of the soluble diffusion barrier. *J Cell Biol.*  
24 203:129–147. doi:10.1083/jcb.201212024.
- 25 Chuang, J.-Z., Y.-C. Hsu, and C.-H. Sung. 2015. Ultrastructural visualization of trans-ciliary  
26 rhodopsin cargoes in mammalian rods. *Cilia.* 4:4. doi:10.1186/s13630-015-0013-1.
- 27 Clement, C.A., K.D. Ajbro, K. Koefoed, M.L. Vestergaard, I.R. Veland, M.P.R.  
28 Henriques de Jesus, L.B. Pedersen, A. Benmerah, C.Y. Andersen, L.A. Larsen, and S.T.  
29 Christensen. 2013. TGF- $\beta$  Signaling Is Associated with Endocytosis at the Pocket Region of the  
30 Primary Cilium. *Cell Rep.* 3:1806–1814. doi:10.1016/j.celrep.2013.05.020.
- 31 van Dam, T.J.P., M.J. Townsend, M. Turk, A. Schlessinger, A. Sali, M.C. Field, and M.A.  
32 Huynen. 2013. Evolution of modular intraflagellar transport from a coatomer-like progenitor.  
33 *Proc. Natl. Acad. Sci. U. S. A.* 110:6943–6948. doi:10.1073/pnas.1221011110.
- 34 Datta, P., C. Allamargot, J.S. Hudson, E.K. Andersen, S. Bhattarai, A.V. Drack, V.C. Sheffield,  
35 and S. Seo. 2015. Accumulation of non-outer segment proteins in the outer segment underlies  
36 photoreceptor degeneration in Bardet–Biedl syndrome. *Proc. Natl. Acad. Sci.* 112:E4400–E4409.  
37 doi:10.1073/pnas.1510111112.
- 38 Deschout, H., F.C. Zancchi, M. Mlodzianoski, A. Diaspro, J. Bewersdorf, S.T. Hess, and K.  
39 Braeckmans. 2014. Precisely and accurately localizing single emitters in fluorescence  
40 microscopy. *Nat. Methods.* 11:253. doi:10.1038/nmeth.2843.

- 2 Domire, J.S., J.A. Green, K.G. Lee, A.D. Johnson, C.C. Askwith, and K. Mykytyn. 2011.  
3 Dopamine receptor 1 localizes to neuronal cilia in a dynamic process that requires the Bardet-  
4 Biedl syndrome proteins. *Cell. Mol. Life Sci. CMLS*. 68:2951–2960. doi:10.1007/s00018-010-  
5 0603-4.
- 6 Dyson, J.M., S.E. Conduit, S.J. Feeney, S. Hakim, T. DiTommaso, A.J. Fulcher, A. Sriratana, G.  
7 Ramm, K.A. Horan, R. Gurung, C. Wicking, I. Smyth, and C.A. Mitchell. 2017. INPP5E  
8 regulates phosphoinositide-dependent cilia transition zone function. *J. Cell Biol.* 216:247–263.  
9 doi:10.1083/jcb.201511055.
- 10 Eguether, T., J.T. San Agustin, B.T. Keady, J.A. Jonassen, Y. Liang, R. Francis, K. Tobita, C.A.  
11 Johnson, Z.A. Abdelhamed, C.W. Lo, and G.J. Pazour. 2014. IFT27 Links the BBSome to IFT  
12 for Maintenance of the Ciliary Signaling Compartment. *Dev. Cell.* 31:279–290.  
13 doi:10.1016/j.devcel.2014.09.011.
- 14 Endoh-Yamagami, S., M. Evangelista, D. Wilson, X. Wen, J.-W. Theunissen, K. Phamluong, M.  
15 Davis, S.J. Scales, M.J. Solloway, F.J. de Sauvage, and A.S. Peterson. 2009. The Mammalian  
16 Cos2 Homolog Kif7 Plays an Essential Role in Modulating Hh Signal Transduction during  
17 Development. *Curr. Biol.* 19:1320–1326. doi:10.1016/j.cub.2009.06.046.
- 18 Ferreira, J.P., R.W.S. Peacock, I.E.B. Lawhorn, and C.L. Wang. 2011. Modulating ectopic gene  
19 expression levels by using retroviral vectors equipped with synthetic promoters. *Syst. Synth. Biol.*  
20 5:131–138. doi:10.1007/s11693-011-9089-0.
- 21 Fu, W., L. Wang, S. Kim, J. Li, and B.D. Dynlacht. 2016. Role for the IFT-A Complex in  
22 Selective Transport to the Primary Cilium. *Cell Rep.* 17:1505–1517.  
23 doi:10.1016/j.celrep.2016.10.018.
- 24 Garcia-Gonzalo, F.R., and J.F. Reiter. 2012. Scoring a backstage pass: Mechanisms of  
25 ciliogenesis and ciliary access. *J. Cell Biol.* 197:697–709. doi:10.1083/jcb.201111146.
- 26 Gillingham, A.K., and S. Munro. 2000. The PACT domain, a conserved centrosomal targeting  
27 motif in the coiled-coil proteins AKAP450 and pericentrin. *EMBO Rep.* 1:524–529.  
28 doi:10.1093/embo-reports/kvd105.
- 29 Goetz, S.C., F. Bangs, C.L. Barrington, N. Katsanis, and K.V. Anderson. 2017. The Meckel  
30 syndrome- associated protein MKS1 functionally interacts with components of the BBSome and  
31 IFT complexes to mediate ciliary trafficking and hedgehog signaling. *PLOS ONE*. 12:e0173399.  
32 doi:10.1371/journal.pone.0173399.
- 33 Gonçalves, J., and L. Pelletier. 2017. The Ciliary Transition Zone: Finding the Pieces and  
34 Assembling the Gate. *Mol. Cells.* 40:243–253. doi:10.14348/molcells.2017.0054.
- 35 Green, J.A., C.L. Schmid, E. Bley, P.C. Monsma, A. Brown, L.M. Bohn, and K. Mykytyn. 2016.  
36 Recruitment of  $\beta$ -Arrestin into Neuronal Cilia Modulates Somatostatin Receptor Subtype 3  
37 Ciliary Localization. *Mol. Cell. Biol.* 36:223–235. doi:10.1128/MCB.00765-15.
- 38 Guadiana, S.M., S. Semple-Rowland, D. Daroszewski, I. Madorsky, J.J. Breunig, K. Mykytyn,  
39 and M.R. Sarkisian. 2013. Arborization of Dendrites by Developing Neocortical Neurons Is  
40 Dependent on Primary Cilia and Type 3 Adenylyl Cyclase. *J. Neurosci.* 33:2626–2638.  
41 doi:10.1523/JNEUROSCI.2906-12.2013.

- 2 He, M., R. Subramanian, F. Bangs, T. Omelchenko, K.F.L. Jr, T.M. Kapoor, and K.V. Anderson.  
3 2014. The kinesin-4 protein Kif7 regulates mammalian Hedgehog signalling by organizing the  
4 cilium tip compartment. *Nat. Cell Biol.* 16:663. doi:10.1038/ncb2988.
- 5 Howarth, M., and A.Y. Ting. 2008. Imaging proteins in live mammalian cells with biotin ligase  
6 and monovalent streptavidin. *Nat. Protoc.* 3:534–545. doi:10.1038/nprot.2008.20.
- 7 Hunnicutt, G.R., M.G. Kosfisz, and W.J. Snell. 1990. Cell body and flagellar agglutinins in  
8 *Chlamydomonas reinhardtii*: the cell body plasma membrane is a reservoir for agglutinins whose  
9 migration to the flagella is regulated by a functional barrier. *J. Cell Biol.* 111:1605–1616.
- 10 Hwang, S., K.A. White, B.N. Somatilaka, J.M. Shelton, J.A. Richardson, and S. Mukhopadhyay.  
11 2017. The G-protein-coupled receptor Gpr161 regulates forelimb formation, limb patterning and  
12 skeletal morphogenesis in a primary cilium-dependent manner. *Development.* dev.154054.  
13 doi:10.1242/dev.154054.
- 14 Jékely, G., and D. Arendt. 2006. Evolution of intraflagellar transport from coated vesicles and  
15 autogenous origin of the eukaryotic cilium. *BioEssays.* 28:191–198. doi:10.1002/bies.20369.
- 16 Jensen, C. g., C. a. Poole, S. r. McGlashan, M. Marko, Z. i. Issa, K. v. Vujcich, and S. s. Bowser.  
17 2004. Ultrastructural, tomographic and confocal imaging of the chondrocyte primary cilium in  
18 situ. *Cell Biol. Int.* 28:101–110. doi:10.1016/j.cellbi.2003.11.007.
- 19 Jensen, V.L., and M.R. Leroux. 2017. Gates for soluble and membrane proteins, and two  
20 trafficking systems (IFT and LIFT), establish a dynamic ciliary signaling compartment. *Curr.*  
21 *Opin. Cell Biol.* 47:83–91. doi:10.1016/j.ceb.2017.03.012.
- 22 Jin, H., S.R. White, T. Shida, S. Schulz, M. Aguiar, S.P. Gygi, J.F. Bazan, and M.V. Nachury.  
23 2010. The conserved Bardet-Biedl Syndrome proteins assemble a coat that traffics membrane  
24 proteins to cilia. *Cell.* 141:1208–1219. doi:10.1016/j.cell.2010.05.015.
- 25 Kamachi, Y., and H. Kondoh. 1993. Overlapping positive and negative regulatory elements  
26 determine lens-specific activity of the delta 1-crystallin enhancer. *Mol. Cell. Biol.* 13:5206–5215.
- 27 Kanie, T., K.L. Abbott, N.A. Mooney, E.D. Plowey, J. Demeter, and P.K. Jackson. 2017. The  
28 CEP19-RABL2 GTPase Complex Binds IFT-B to Initiate Intraflagellar Transport at the Ciliary  
29 Base. *Dev. Cell.* 42:22–36.e12. doi:10.1016/j.devcel.2017.05.016.
- 30 Kubo, T., J.M. Brown, K. Bellve, B. Craige, J.M. Craft, K. Fogarty, K.F. Lechtreck, and G.B.  
31 Witman. 2016. Together, the IFT81 and IFT74 N-termini form the main module for intraflagellar  
32 transport of tubulin. *J. Cell Sci.* 129:2106–2119. doi:10.1242/jcs.187120.
- 33 Kwon, R.Y., S. Temiyasathit, P. Tummala, C.C. Quah, and C.R. Jacobs. 2010. Primary cilium-  
34 dependent mechanosensing is mediated by adenylyl cyclase 6 and cyclic AMP in bone cells.  
35 *FASEB J.* 24:2859–2868. doi:10.1096/fj.09-148007.
- 36 Lau, L., Y.L. Lee, S.J. Sahl, T. Stearns, and W.E. Moerner. 2012. STED Microscopy with  
37 Optimized Labeling Density Reveals 9-Fold Arrangement of a Centriole Protein. *Biophys. J.*  
38 102:2926–2935. doi:10.1016/j.bpj.2012.05.015.
- 39 Lechtreck, K.F. 2015. IFT–Cargo Interactions and Protein Transport in Cilia. *Trends Biochem.*  
40 *Sci.* 40:765–778. doi:10.1016/j.tibs.2015.09.003.

- 2 Lechtreck, K.F., J.M. Brown, J.L. Sampaio, J.M. Craft, A. Shevchenko, J.E. Evans, and G.B.  
3 Witman. 2013. Cycling of the signaling protein phospholipase D through cilia requires the  
4 BBSome only for the export phase. *J. Cell Biol.* 201:249–261. doi:10.1083/jcb.201207139.
- 5 Lechtreck, K.-F., E.C. Johnson, T. Sakai, D. Cochran, B.A. Ballif, J. Rush, G.J. Pazour, M.  
6 Ikebe, and G.B. Witman. 2009. The *Chlamydomonas reinhardtii* BBSome is an IFT cargo  
7 required for export of specific signaling proteins from flagella. *J. Cell Biol.* 187:1117–1132.  
8 doi:10.1083/jcb.200909183.
- 9 Liem, K.F., M. He, P.J.R. Ocbina, and K.V. Anderson. 2009. Mouse Kif7/Costal2 is a cilia-  
10 associated protein that regulates Sonic hedgehog signaling. *Proc. Natl. Acad. Sci. U. S. A.*  
11 106:13377–13382. doi:10.1073/pnas.0906944106.
- 12 Liew, G.M., F. Ye, A.R. Nager, J.P. Murphy, J.S. Lee, M. Aguiar, D.K. Breslow, S.P. Gygi, and  
13 M.V. Nachury. 2014. The Intraflagellar Transport Protein IFT27 Promotes BBSome Exit from  
14 Cilia through the GTPase ARL6/BBS3. *Dev. Cell.* 31:265–278.  
15 doi:10.1016/j.devcel.2014.09.004.
- 16 Liu, Y.C., A.L. Couzens, A.R. Deshwar, L.D.B. McBroom-Cerajewski, X. Zhang, V.  
17 Puvion-Randall, I.C. Scott, A.-C. Gingras, C. Hui, and S. Angers. 2014. The PPF1A1-PP2A protein  
18 complex promotes trafficking of Kif7 to the ciliary tip and Hedgehog signaling. *Sci Signal.*  
19 7:ra117-ra117. doi:10.1126/scisignal.2005608.
- 20 Loktev, A.V., and P.K. Jackson. 2013. Neuropeptide Y Family Receptors Traffic via the Bardet-  
21 Biedl Syndrome Pathway to Signal in Neuronal Primary Cilia. *Cell Rep.* 5:1316–1329.  
22 doi:10.1016/j.celrep.2013.11.011.
- 23 Mangeol, P., B. Prevo, and E.J.G. Peterman. 2016. KymographClear and KymographDirect: two  
24 tools for the automated quantitative analysis of molecular and cellular dynamics using  
25 kymographs. *Mol. Biol. Cell.* 27:1948–1957. doi:10.1091/mbc.E15-06-0404.
- 26 Masyuk, A.I., S.A. Gradilone, J.M. Banales, B.Q. Huang, T.V. Masyuk, S.-O. Lee, P.L. Splinter,  
27 A.J. Stroope, and N.F. LaRusso. 2008. Cholangiocyte primary cilia are chemosensory organelles  
28 that detect biliary nucleotides via P2Y12 purinergic receptors. *Am. J. Physiol. - Gastrointest.*  
29 *Liver Physiol.* 295:G725–G734. doi:10.1152/ajpgi.90265.2008.
- 30 Mick, D.U., R.B. Rodrigues, R.D. Leib, C.M. Adams, A.S. Chien, S.P. Gygi, and M.V. Nachury.  
31 2015. Proteomics of Primary Cilia by Proximity Labeling. *Dev. Cell.* 35:497–512.  
32 doi:10.1016/j.devcel.2015.10.015.
- 33 Milenkovic, L., M.P. Scott, and R. Rohatgi. 2009. Lateral transport of Smoothened from the  
34 plasma membrane to the membrane of the cilium. *J. Cell Biol.* 187:365–374.  
35 doi:10.1083/jcb.200907126.
- 36 Milenkovic, L., L.E. Weiss, J. Yoon, T.L. Roth, Y.S. Su, S.J. Sahl, M.P. Scott, and W.E.  
37 Moerner. 2015. Single-molecule imaging of Hedgehog pathway protein Smoothened in primary  
38 cilia reveals binding events regulated by Patched1. *Proc. Natl. Acad. Sci. U. S. A.* 112:8320–  
39 8325. doi:10.1073/pnas.1510094112.
- 40 Moore, B.S., A.N. Stepanchick, P.H. Tewson, C.M. Hartle, J. Zhang, A.M. Quinn, T.E. Hughes,  
41 and T. Mirshahi. 2016. Cilia have high cAMP levels that are inhibited by Sonic Hedgehog-  
42 regulated calcium dynamics. *Proc. Natl. Acad. Sci. U. S. A.* 113:13069–13074.  
43 doi:10.1073/pnas.1602393113.

- 2 Morita, E., J. Arii, D. Christensen, J. Votteler, and W.I. Sundquist. 2012. Attenuated Protein  
3 Expression Vectors for Use in siRNA Rescue Experiments. *BioTechniques*. 0:1–5.  
4 doi:10.2144/000113909.
- 5 Mukhopadhyay, S., X. Wen, B. Chih, C.D. Nelson, W.S. Lane, S.J. Scales, and P.K. Jackson.  
6 2010. TULP3 bridges the IFT-A complex and membrane phosphoinositides to promote  
7 trafficking of G protein-coupled receptors into primary cilia. *Genes Dev*. 24:2180–2193.  
8 doi:10.1101/gad.1966210.
- 9 Mukhopadhyay, S., X. Wen, N. Ratti, A. Loktev, L. Rangell, S.J. Scales, and P.K. Jackson.  
10 2013. The Ciliary G-Protein-Coupled Receptor Gpr161 Negatively Regulates the Sonic  
11 Hedgehog Pathway via cAMP Signaling. *Cell*. 152:210–223. doi:10.1016/j.cell.2012.12.026.
- 12 Nachury, M.V. 2008. Tandem Affinity Purification of the BBSome, a Critical Regulator of Rab8  
13 in Ciliogenesis. *In Methods in Enzymology*. Academic Press. 501–513.
- 14 Nachury, M.V., E.S. Seeley, and H. Jin. 2010. Trafficking to the Ciliary Membrane. *Annu. Rev.*  
15 *Cell Dev. Biol.* 26:59–87. doi:10.1146/annurev.cellbio.042308.113337.
- 16 Nager, A.R., J.S. Goldstein, V. Herranz-Pérez, D. Portran, F. Ye, J.M. Garcia-Verdugo, and  
17 M.V. Nachury. 2017. An Actin Network Dispatches Ciliary GPCRs into Extracellular Vesicles  
18 to Modulate Signaling. *Cell*. 168:252–263.e14. doi:10.1016/j.cell.2016.11.036.
- 19 Ou, G., O.E. Blacque, J.J. Snow, M.R. Leroux, and J.M. Scholey. 2005. Functional coordination  
20 of intraflagellar transport motors. *Nature*. 436:583. doi:10.1038/nature03818.
- 21 Pal, K., S. Hwang, B. Somatilaka, H. Badgandi, P.K. Jackson, K. DeFea, and S. Mukhopadhyay.  
22 2016. Smoothed determines  $\beta$ -arrestin-mediated removal of the G protein-coupled receptor  
23 Gpr161 from the primary cilium. *J. Cell Biol.* 212:861–875. doi:10.1083/jcb.201506132.
- 24 Prevo, B., P. Mangeol, F. Oswald, J.M. Scholey, and E.J.G. Peterman. 2015. Functional  
25 differentiation of cooperating kinesin-2 motors orchestrates cargo import and transport in *C.*  
26 *elegans* cilia. *Nat. Cell Biol.* 17:1536. doi:10.1038/ncb3263.
- 27 Putoux, A., S. Thomas, K.L.M. Coene, E.E. Davis, Y. Alanay, G. Ogur, E. Uz, D. Buzas, C.  
28 Gomes, S. Patrier, C.L. Bennett, N. Elkhartoufi, M.-H.S. Frison, L. Rigonnot, N. Joyé, S.  
29 Pruvost, G.E. Utine, K. Boduroglu, P. Nitschke, L. Fertitta, C. Thauvin-Robinet, A. Munnich, V.  
30 Cormier-Daire, R. Hennekam, E. Colin, N.A. Akarsu, C. Bole-Feysot, N. Cagnard, A. Schmitt,  
31 N. Goudin, S. Lyonnet, F. Encha-Razavi, J.-P. Siffroi, M. Winey, N. Katsanis, M. Gonzales, M.  
32 Vekemans, P.L. Beales, and T. Attié-Bitach. 2011. *KIF7* mutations cause fetal hydroletharus and  
33 acrocallosal syndromes. *Nat. Genet.* 43:601. doi:10.1038/ng.826.
- 34 Rohrer, S.P., E.T. Birzin, R.T. Mosley, S.C. Berk, S.M. Hutchins, D.-M. Shen, Y. Xiong, E.C.  
35 Hayes, R.M. Parmar, F. Foor, S.W. Mitra, S.J. Degrado, M. Shu, J.M. Klopp, S.-J. Cai, A. Blake,  
36 W.W.S. Chan, A. Pasternak, L. Yang, A.A. Patchett, R.G. Smith, K.T. Chapman, and J.M.  
37 Schaeffer. 1998. Rapid Identification of Subtype-Selective Agonists of the Somatostatin  
38 Receptor Through Combinatorial Chemistry. *Science*. 282:737–740.  
39 doi:10.1126/science.282.5389.737.
- 40 Roth, A., H.J. Kreienkamp, W. Meyerhof, and D. Richter. 1997. Phosphorylation of four amino  
41 acid residues in the carboxyl terminus of the rat somatostatin receptor subtype 3 is crucial for its  
42 desensitization and internalization. *J. Biol. Chem.* 272:23769–23774.

- 2 Sage, D., F.R. Neumann, F. Hediger, S.M. Gasser, and M. Unser. 2005. Automatic tracking of  
3 individual fluorescence particles: application to the study of chromosome dynamics. *IEEE Trans.*  
4 *Image Process.* 14:1372–1383. doi:10.1109/TIP.2005.852787.
- 5 Shaner, N.C., R.E. Campbell, P.A. Steinbach, B.N.G. Giepmans, A.E. Palmer, and R.Y. Tsien.  
6 2004. Improved monomeric red, orange and yellow fluorescent proteins derived from *Discosoma*  
7 sp. red fluorescent protein. *Nat. Biotechnol.* 22:1567. doi:10.1038/nbt1037.
- 8 Shaner, N.C., G.G. Lambert, A. Chamma, Y. Ni, P.J. Cranfill, M.A. Baird, B.R. Sell, J.R. Allen,  
9 R.N. Day, M. Israelsson, M.W. Davidson, and J. Wang. 2013. A bright monomeric green  
10 fluorescent protein derived from *Branchiostoma lanceolatum*. *Nat. Methods.* 10:407–409.  
11 doi:10.1038/nmeth.2413.
- 12 Shen, F., L. Cheng, A.E. Douglas, N.A. Riobo, and D.R. Manning. 2013. Smoothed Is a Fully  
13 Competent Activator of the Heterotrimeric G Protein Gi. *Mol. Pharmacol.* 83:691–697.  
14 doi:10.1124/mol.112.082511.
- 15 Su, X., K. Driscoll, G. Yao, A. Raed, M. Wu, P.L. Beales, and J. Zhou. 2014. Bardet–Biedl  
16 syndrome proteins 1 and 3 regulate the ciliary trafficking of polycystic kidney disease 1 protein.  
17 *Hum. Mol. Genet.* 23:5441–5451. doi:10.1093/hmg/ddu267.
- 18 Trimble, W.S., and S. Grinstein. 2015. Barriers to the free diffusion of proteins and lipids in the  
19 plasma membrane. *J. Cell Biol.* 208:259–271. doi:10.1083/jcb.201410071.
- 20 Williams, C.L., J.C. McIntyre, S.R. Norris, P.M. Jenkins, L. Zhang, Q. Pei, K. Verhey, and J.R.  
21 Martens. 2014. Direct evidence for BBSome-associated intraflagellar transport reveals distinct  
22 properties of native mammalian cilia. *Nat. Commun.* 5. doi:10.1038/ncomms6813.
- 23 Yang, T.T., W.M. Chong, W.-J. Wang, G. Mazo, B. Tanos, Z. Chen, M.N.T. Tran, Y.-D. Chen,  
24 R.R. Weng, C.-E. Huang, W.-N. Jane, M.-F.B. Tsou, and J.-C. Liao. 2017. Architecture of  
25 mammalian centriole distal appendages accommodates distinct blade and matrix functional  
26 elements. *bioRxiv.* 193474. doi:10.1101/193474.
- 27 Yang, T.T., J. Su, W.-J. Wang, B. Craige, G.B. Witman, M.-F.B. Tsou, and J.-C. Liao. 2015.  
28 Superresolution Pattern Recognition Reveals the Architectural Map of the Ciliary Transition  
29 Zone. *Sci. Rep.* 5:14096. doi:10.1038/srep14096.
- 30 Yasuda, K., S. Rens-Domiano, C.D. Breder, S.F. Law, C.B. Saper, T. Reisine, and G.I. Bell.  
31 1992. Cloning of a novel somatostatin receptor, SSTR3, coupled to adenylyl cyclase. *J. Biol.*  
32 *Chem.* 267:20422–20428.
- 33 Ye, F., D.K. Breslow, E.F. Koslover, A.J. Spakowitz, W.J. Nelson, and M.V. Nachury. 2013.  
34 Single molecule imaging reveals a major role for diffusion in the exploration of ciliary space by  
35 signaling receptors. *Elife.* 2:e00654.
- 36 Yee, L.E., F.R. Garcia-Gonzalo, R.V. Bowie, C. Li, J.K. Kennedy, K. Ashrafi, O.E. Blacque,  
37 M.R. Leroux, and J.F. Reiter. 2015. Conserved Genetic Interactions between Ciliopathy  
38 Complexes Cooperatively Support Ciliogenesis and Ciliary Signaling. *PLoS Genet.* 11.  
39 doi:10.1371/journal.pgen.1005627.
- 40 Yeh, C., A. Li, J.-Z. Chuang, M. Saito, A. Cáceres, and C.-H. Sung. 2013. IGF-1 activates a  
41 cilium-localized non-canonical G $\beta$  signaling pathway that regulates cell cycle progression. *Dev.*  
42 *Cell.* 26:358–368. doi:10.1016/j.devcel.2013.07.014.

2 Zhang, Q., D. Nishimura, S. Seo, T. Vogel, D.A. Morgan, C. Searby, K. Bugge, E.M. Stone, K.  
3 Rahmouni, and V.C. Sheffield. 2011. Bardet-Biedl syndrome 3 (Bbs3) knockout mouse model  
4 reveals common BBS-associated phenotypes and Bbs3 unique phenotypes. *Proc. Natl. Acad. Sci.*  
5 *U. S. A.* 108:20678–20683. doi:10.1073/pnas.1113220108.

6 Zhang, Y., S. Seo, S. Bhattarai, K. Bugge, C.C. Searby, Q. Zhang, A.V. Drack, E.M. Stone, and  
7 V.C. Sheffield. 2014. BBS mutations modify phenotypic expression of CEP290-related  
8 ciliopathies. *Hum. Mol. Genet.* 23:40–51. doi:10.1093/hmg/ddt394.

9 Zhang, Y.-F., Y. Phung, W. Gao, S. Kawa, R. Hassan, I. Pastan, and M. Ho. 2015. New High  
10 Affinity Monoclonal Antibodies Recognize Non-Overlapping Epitopes On Mesothelin For  
11 Monitoring And Treating Mesothelioma. *Sci. Rep.* 5. doi:10.1038/srep09928.

12

13



## 2 **Acknowledgments**

3 We thank M. Bornens for the Ninein antibody, S. Saunier for the Cep290 antibody, T. Stearns  
4 for the Cep164 antibody, K. Anderson for the Kif7 cDNA, S. Mukhopadhyay for the  
5 GPR161 antibody, P. Beachy for the  $\delta$ -crystallin promoter, J. Eggenschweiler for the  
6 Tulp3 antibody, C. Smith for the BBS5 monoclonal antibody, M. Lin for neurons, T.  
7 Gadella for mScarlet cDNA, Novartis for ACQ090, and A. Kopp and J. Goldstein for  
8 technical assistance. We thank Drs. K. Hill, A. Benmerah and the Nachury lab for  
9 comments on the manuscript. This work was supported by NIH funding (GM089933 to  
10 M.V.N) and a Fayez Sarofim/Damon Runyon Fellowship to A.R.N. (DRG 2160-13). The  
11 authors declare no competing financial interests.

## 12 **Author contributions**

13 M.V.N. conceived and coordinated the project and wrote the paper with contributions from all  
14 authors; F.Y. and A.R.N jointly developed the cell lines used for imaging of GPCRs and  
15 BBSome; F.Y. conducted all single-molecule imaging and the quantitative analysis of  
16 BBSome trains and exit. Data described can be found in the main figures and  
17 supplementary materials. The authors declare no conflict of interest.

## Figure 1. Reconstitution of signal-dependent retrieval of SSTR3 and GPR161

(A) Diagram of the signal-dependent retrieval systems under study. Left: addition of somatostatin triggers SSTR3 exit from cilia by directly activating SSTR3. Right: addition of Smoothed agonist (SAG) activates the Hedgehog pathway and promotes GPR161 retrieval. (B) Kinetics of SSTR3 disappearance from cilia of primary hippocampal neurons and of IMCD3 stably expressing  $^{AP}SSTR3^{NG}$  under the control of the TATA-less EF1 $\alpha$  promoter were estimated by quantitation of immunofluorescence signals following addition of sst. The entire data set for the sst condition is shown in Fig. S1B. Data were fitted to a single exponential. Error bars: 95% CI.  $N = 280-424$  cilia (neurons), 57-80 cilia (IMCD3). (C) High level expression of SSTR3 drives elongation of primary cilia. Top:  $^{AP}SSTR3^{GFP}$  driven by various promoters or  $^{AP}SSTR3^{NG}$  driven by EF1 $\alpha^{\Delta}$  promoter was expressed stably at the FlpIn locus of IMCD3 cells and ciliary fluorescence levels were measured and compared to a GFP calibrator (Breslow et al., 2013) or a NG calibrator (see Methods). Endogenous SSTR3 levels were estimated by comparative immunostaining (see Methods). A Mann-Whitney test was used for pairwise comparisons of the number of SSTR3 molecules per cilia in neurons and in IMCD3 cells expressing  $^{AP}SSTR3^{NG}$  or  $^{AP}SSTR3^{GFP}$  under the control of pEF1 $\alpha^{\Delta}$ . n.s.: no significant differences were observed.  $P > 0.05$ .  $N = 10-38$  cilia. Error bars: SD. Bottom: Effect of  $^{AP}SSTR3^{GFP}$  expression on cilium length. Cilia lengths were measured in the GFP channel by live-cell imaging. Error bars represent SD,  $N = 10-38$  cilia. Cilium lengthening upon GPCR overexpression was previously reported by (Guadiana et al., 2013). (D) IMCD3-[pCrys- $^{AP}GPR161^{3NG}$ ] were treated for 2 h with either SAG or vehicle.  $^{AP}GPR161^{3NG}$  was visualized by NG fluorescence, basal bodies of cilia stained with Ninein. All cells were pre-treated with the translation inhibitor emetine to eliminate signals from new protein synthesis. Scale bar: 4  $\mu$ m. (E) Absolute quantitation of ciliary GPCR abundance. Top: Calibration of single molecule fluorescence intensity. Bacterially expressed triple NeonGreen (NG3) protein was spotted on glass coverslips (inset) and the fluorescent intensity of each individual NG3 was measured.  $N = 1257$  particles measured. Bottom: The 3-step photobleaching of a representative spot shows that the fluorescence was emitted by a single NG3 molecule. The measured fluorescence intensity of NG3 was used to calibrate NG- and NG3-tagged SSTR3, GPR161, BBS5 and IFT88. (F) IMCD3-[pEF1 $\alpha^{\Delta}$ - $^{AP}SSTR3^{NG}$ ] cells were treated with vehicle or sst for 2h. Stable expression of an ER-localized biotin ligase BirA enables the biotinylation of  $^{AP}SSTR3$  with the biotin exists in the DMEM/F12 cell culture medium. Ciliary  $^{AP}SSTR3$  was pulse-labeled by Alexa647-conjugated mSA (mSA647) for 5-10 min before imaging (see Methods for details). The absolute number of  $^{AP}SSTR3^{NG}$  molecules per cilia at  $t_0$  was calculated by measuring the NG signal and using the NG3 calibrator. For all other time points, the ratio in ciliary mSA647 signal compared to  $t_0$  was used to calculate the absolute number of molecules (see Methods for details). Data were fitted to a single exponential. Error bars: 95% CI.  $N = 14$  cilia. (G) IMCD3-[pCrys-GPR161 $^{3NG}$ ] cells were treated with SAG or vehicle for 2h. NG fluorescence was tracked in individual cilia and the ratio of GPR161 $^{3NG}$  to endogenous GPR161 was used to calculate the total levels of GPR161 as detailed in Method. Data were fitted to a single exponential. Error bars: 95% CI.  $N = 12-20$  cilia.

## Figure 2. Roles of IFT-A and BBSome in ciliary entry and exit

(A) Tulp3 is required for ciliary entry of SSTR3. Box plots of ciliary  $^{AP}SSTR3^{NG}$  intensities measured by NG fluorescence (Relative Fluorescent Unit, RFU) for various IMCD3 lines. *Tulp3*<sup>-/-</sup> cells were fixed to identify cilia using anti-acetylated tubulin staining, all other cells were imaged live as cilia were readily identified in the NG channel. NG fluorescence was not affected by fixation (Fig. S2B). Asterisks indicate ANOVA significance values; \*\*\*  $P < 10^{-4}$ , n.s.  $P > 0.05$ .  $N = 18-59$  cilia. (B) IFT-A directly recognizes SSTR3<sup>i3</sup>. The IFT-A complex was purified from IMCD3-[LAP-IFT43] cells and incubated with beads coated with GST-SSTR3<sup>i3</sup> or GST-SSTR5<sup>i3</sup>. Captured materials were eluted by cleaving off the beads and visualized by silver stain and immunoblotting. 5 input equivalents were loaded in the eluate lanes. (C) Model of ciliary entry. (D-E) BBSome subunits were depleted by siRNA, *Arl6*, *Ifi27* and  $\beta$ -arrestin 2 (*Arb2*) genes were knocked out by genome editing and SA/TA denotes a phosphomutant of the C-tail of SSTR3 that is unable to bind to  $\beta$ -arrestin 2. (D) Representative time series of  $^{AP}SSTR3$  pulse-labeled with mSA647 under different conditions. Scale bar: 2  $\mu$ m (E) Absolute retrieval rates were calculated by linear fitting of retrieval kinetics measured from SSTR3 pulse-chase labeling as in (D) (see Methods and (Nager et al., 2017)). Error bars: error of the fit.  $N = 10-35$  cilia. (F) BBSome purified to near-homogeneity from bovine retina was incubated with glutathione beads coated with GST, GST-GPR161<sup>Ct</sup> and GST-SSTR3<sup>i3</sup>. Captured materials were cleavage-eluted and immunoblotted. 3 input equivalents were loaded in the eluate lanes. (G) Signal-dependent retrieval requires the joint activities of Arl6-GTP, BBSome and  $\beta$ -arrestin 2.

### Figure 3. A Gai-PKA axis promotes BBSome tip accumulation

(A) Near endogenous expression of <sup>NG3</sup>BBS5. IMCD3 and IMCD3-[pEF1 $\alpha$ -<sup>NG3</sup>BBS5] cells were subjected to immunoprecipitation with an anti-BBS5 antibody and lysates and eluates were immunoblotted for BBS5. Molecular weights (kDa) are indicated on the right. Measurement of band intensities with Image Lab (Bio-Rad) indicates that the molar ratios between <sup>NG3</sup>BBS5 and endogenous BBS5 is 1.27. (B) IMCD3-[pEF1 $\alpha^{\Delta-AP}$ SSTR3, pEF1 $\alpha$ -<sup>NG3</sup>BBS5] were treated with sst or vehicle for 40 min. Top: Representative images of cilia from live cells. <sup>NG3</sup>BBS5 is in fire scale and a white cross marks the location of the basal body (see S2J). Bottom: linescans of <sup>NG3</sup>BBS5 fluorescence intensities along cilia of live cells. The line marks the average intensity along length-normalized cilia. The shaded area shows the 95% confidence interval.  $N = 20-29$  cilia. Scale bar: 1  $\mu\text{m}$ . (C) <sup>NG3</sup>BBS5 tip fluorescence intensities were quantified in live cells after 40 min of incubation with sst, SAG, Rp-cAMPs or PKI. Cells were pre-incubated with Pertussis toxin (PTX) for 16 h to fully inactivate  $G\alpha_i$ . Representative images are shown in the lower panels with the tip marked by a yellow arrow. The total number of BBS5 molecules at the tip was calculated using the NG3 calibrator and the measured ratio of <sup>NG3</sup>BBS5 to total BBS5. The whiskers represent 1.5x the interquartile range. Asterisks indicate Mann Whitney test significance values; \*\*\*  $P < 0.0005$ .  $N = 20-29$  cilia from 3 independent experiments. Scale bar: 2  $\mu\text{m}$ . (D) IMCD3 or IMCD3-[pEF1 $\alpha^{\Delta-AP}$ SSTR3<sup>NG</sup>] cells were treated with vehicle, sst or SAG for 40 min before fixation. The bar graph shows the percentage of BBS9-positive tips detected by immunofluorescence staining of endogenous BBS9. Error bar: SD.  $N = 52-99$  cilia. (E) The pathways downstream of Smoothed (SMO) and SSTR3 and the site of action of the pharmacological perturbations are shown. (F) Representative immunofluorescence images of ciliary BBS9 (red) in IMCD3-[pEF1 $\alpha$ -NPHP3<sup>GFP-PKI</sup>] and IMCD3-[pEF1 $\alpha$ -NPHP3<sup>GFP-PKIdead</sup>] cells (Mick et al., 2015). Optical sections were deconvolved and X-Z projections are shown. Arrows mark the tips of cilia. Percentage of BBS9 positive ciliary tip are plotted in the right panel. Scale bar: 2  $\mu\text{m}$ .

**Figure 4. BBSome tip accumulation is required for the retrieval of SSTR3 and GPR161**

(A-B) Pertussis toxin slows down the exit of SSTR3 (A) and GPR161 (B). IMCD3-[pEF1 $\alpha^{\Delta}$ -<sup>AP</sup>SSTR3<sup>NG</sup>] or IMCD3-[pCrys-<sup>AP</sup>GPR161<sup>3NG</sup>] were pre-treated with PTX for 16 h to fully inactivate G $\alpha_i$ . After agonist treatment, ciliary GPCR levels were measured in live cells as described in Fig. 1F-G. Error bars: 95% CI.  $N = 10-28$  cilia. (C-D) PKA inhibition accelerates the exit of SSTR3 (C) and GPR161 (D). IMCD3-[pEF1 $\alpha^{\Delta}$ -<sup>AP</sup>SSTR3<sup>NG</sup>] or IMCD3-[pCrys-<sup>AP</sup>GPR161<sup>3NG</sup>] cells were treated for 3 h with the indicated concentrations of agonist and/or PKI. Ciliary level of GPCRs were measured by NeonGreen fluorescence before and after treatment to estimate the rate of exit. Addition of PKI together with sub-saturating concentrations of agonist significantly accelerated the GPCR exit rates to the near-maximal values observed with saturating concentrations of agonist. Error bars: Error of the fit.  $N = 67-112$  cilia from 3 independent experiments. Asterisks indicate multiple regression significance values;  $*P < 0.05$ . (E) GPR161 retrieval can be triggered by sst treatment. IMCD3-[pCrys-<sup>AP</sup>GPR161<sup>3NG</sup>] cells were treated with SAG or sst for 2h. NG fluorescence was tracked in individual cilia. Data were fitted to a single exponential. Error bars: 95% CI.  $N = 10-21$  cilia. (F) SAG treatment is not sufficient to trigger the retrieval of SSTR3. IMCD3-[pEF1 $\alpha^{\Delta}$ -<sup>AP</sup>SSTR3<sup>NG</sup>] cells were treated with SAG for 2h. Stable expression of an ER-localized biotin ligase BirA enables detection of <sup>AP</sup>SSTR3 by pulse-labeling live cells with Alexa647-conjugated mSA (mSA647) and tracking individual cilia. Data were fitted to a single exponential. Error bars: 95% CI.  $N = 12$  cilia.

### Figure 5. PKA antagonizes the recruitment of the BBSome to the tip of cilia by Kif7

(A-C) Co-recruitment of BBS5 and Kif7 to the tip of cilia in live IMCD3-[pEF1 $\alpha$ -<sup>NG3</sup>BBS5; pCMV-Kif7<sup>mScarlet</sup>] cells. (A) Representative images showing SAG- and PKI-induced accumulation of <sup>NG3</sup>BBS5 and Kif7<sup>mScarlet</sup> at ciliary tip. Cells were treated with SAG, PKI or vehicle for 40 min before imaging. White boxes mark the ciliary tip and split channels of <sup>NG3</sup>BBS5 and Kif7<sup>mScarlet</sup> are shown on top. Scale bar: 2  $\mu$ m. (B) Correlation between the fluorescence signal of <sup>NG3</sup>BBS5 and Kif7<sup>mScarlet</sup> at the ciliary tip. Fluorescence signals of <sup>NG3</sup>BBS5 and Kif7<sup>mScarlet</sup> were measured at ciliary tip of live cells after 40 min treatment with vehicle, SAG or PKI. Micrographs of <sup>NG3</sup>BBS5 and Kif7<sup>mScarlet</sup> at the ciliary tip for three representative data points are shown. Linear regressions (dotted lines) highlight the positive correlation between ciliary tip levels of <sup>NG3</sup>BBS5 and Kif7<sup>mScarlet</sup> in the presence of SAG or PKI. The Pearson correlation coefficient ( $r$ ) is shown. Student's  $t$ -test of the Pearson's correlation coefficient ( $r$ ) returned a non-significant  $P$  value under control conditions ( $P > 0.7$ ) but a significant value after SAG or PKI treatment ( $P < 10^{-5}$ ).  $N = 40$ -49 cilia. (C) In SAG-treated cells where a second spot of Kif7 is occasionally found along cilia, a second spot of BBS5 was observed at the same location as Kif7. The yellow arrows mark the location of <sup>NG3</sup>BBS5 foci that accumulated at the ectopic tip. Scale bar: 2  $\mu$ m. (D-E) Kif7 is necessary for the redistribution of BBS5 to the tip of cilia. (D) Linescans of <sup>NG3</sup>BBS5 fluorescence intensities along cilia of live cells. Cells were transfected with siRNAs for 72h and treated with sst for 40 min before live imaging of <sup>NG3</sup>BBS5 fluorescence. The line marks the average intensity along length-normalized cilia. The shaded areas show the 95% confidence interval (not shown for the vehicle control).  $N = 20$ -27 cilia. (E) The total number of BBS5 molecules at the tip was calculated as in Fig. 3C. Asterisks indicate Mann Whitney test significance values; \*  $P < 0.05$ .  $N = 20$ -28 cilia from 3 independent experiments. (F) Kif7 interacts with BBSome and PKA antagonizes this interaction. HEK293 cells co-transfected with Kif7<sup>GFP</sup> and Myc<sup>BBS1</sup> were treated with the cAMP phosphodiesterase inhibitor IBMX or vehicle for 30 min before lysis. Complexes were immunoprecipitated with anti-GFP antibodies. Lysates and eluates were blotted for Myc. The capture efficiency of Myc<sup>BBS1</sup> by Kif7<sup>GFP</sup> was decreased  $29 \pm 3\%$  upon treatment with IBMX. Molecular weights (kDa) are indicated on the right.  $N = 3$  independent experiments. (G) Kif7 is necessary for SSTR3 exit from cilia. IMCD3-[<sup>AP</sup>SSTR3<sup>NG</sup>] cells were treated with siRNA targeting Kif7 or Luciferase, pulse-labeled with SA647, and imaged every 10 min following addition of sst. The resulting loss in SA647 fluorescence was plotted and linearly fitted to determine the rate of SSTR3 retrieval. Asterisks indicate Mann Whitney test significance values; \*  $P < 0.05$ , \*\*\*  $P < 0.0005$ . Error bars: SD.  $N = 13$  cilia.

**Figure 6. GPCR signaling and Arl6 drive assembly of large, processive retrograde BBSome trains**

(A) Representative kymographs of BBSome train movement. WT or *Arl6*<sup>-/-</sup> IMCD3-[pEF1 $\alpha$ -<sup>NG3</sup>BBS5; pEF1 $\alpha$  <sup>$\Delta$ -AP</sup>SSTR3] cells were treated with vehicle, sst, SAG or PKI for 40 min before imaging at 4 Hz for 30 s. Scale bar: 2  $\mu$ m (B) Representative kymograph from an IMCD3-[pEF1 $\alpha$ -<sup>NG3</sup>BBS1, pCMV-<sup>tdTomato</sup>IFT88] cell showing the co-movement and the uncoupling between IFT-B and BBSome trains in untreated cells. Nearly 20% of BBSome trains displayed a distinct pause. (C-D) WT or *Arl6*<sup>-/-</sup> IMCD3-[pEF1 $\alpha$ -<sup>NG3</sup>BBS5; pEF1 $\alpha$  <sup>$\Delta$ -AP</sup>SSTR3] cells were treated with vehicle, sst, SAG or PKI for 40 min before imaging. (C) The processivity of retrograde BBSome trains was measured by deconvolving kymographs into anterograde and retrograde components (see methods). The distance traveled by each retrograde train (normalized to the length of cilia) was estimated by manual inspection of the retrograde kymographs.  $N = 52$ -91 cilia from 3 independent experiments. Asterisks indicate the significance values of Mann-Whitney  $U$  test applied to the entire distribution; \*\*\*  $P < 0.0005$ , n.s.  $P > 0.05$ . (D) The fluorescence intensity of <sup>NG3</sup>BBS5 retrograde trains was extracted from deconvolved kymographs and the total number of BBS5 molecules per train was calculated using the NG calibrator (see methods). The whiskers represent 1.5x the interquartile range.  $N = 52$ -91 cilia from 3 independent experiments. Asterisks indicate Mann-Whitney  $U$  test significance values; \*\*\*  $P < 10^{-4}$ , n.s.  $P > 0.05$ . (E) Treatment with sst, SAG or PKI did not change the frequency of retrograde BBSome trains. Error bars: SD.  $N = 9$ -18 cilia. Pairwise Mann-Whitney tests fail to show significant differences between any two conditions ( $P > 0.1$ ). (F) Retrograde velocities of IFT trains, BBSome trains and single SSTR3 molecules. IMCD3-[pEF1 $\alpha$ -<sup>NG3</sup>IFT88], IMCD3-[pEF1 $\alpha$ -<sup>NG3</sup>BBS5; pEF1 $\alpha$  <sup>$\Delta$ -AP</sup>SSTR3] or IMCD3-[pEF1 $\alpha$  <sup>$\Delta$ -AP</sup>SSTR3<sup>NG</sup>] were treated with vehicle, sst, SAG or PKI for 40 min before imaging. IFT and BBSome train velocities were extracted from kymographs (see methods). <sup>QD</sup>SSTR3 velocities were measured from persistent retrograde movements lasting more than 6s. Error range: SD.  $N = 9$ -18 cilia. Pairwise Mann-Whitney tests fail to show significant differences between any two conditions ( $P > 0.1$ ). (G) The number of IFT88 molecules per retrograde train was measured in IMCD3-[pEF1 $\alpha$ -<sup>NG3</sup>IFT88] cells treated with vehicle or SAG. Counting of molecules is detailed in Methods. (H) Arl6 immunofluorescence of cells treated with vehicle, SAG or PKI. Optical sections were deconvolved and X-Z projections are shown. The percentages of Arl6-positive tips are indicated below the micrographs.  $N = 88$ -118 cilia from 4 to 5 microscopic fields.

**Figure 7. Signaling promotes coupling between BBSome and cargoes**

(A) Representative images showing ciliary GPR161<sup>3NG</sup> fluorescence recovery after photobleaching (FRAP). IMCD3-[pCrys-<sup>AP</sup>GPR161<sup>3NG</sup>] cells were treated with vehicle or SAG for 40 min before imaging. A white dotted box in the first image indicates the photobleaching area that covers more than 80% of the cilia except the tip. After photobleaching, ciliary GPR161<sup>3NG</sup> images are acquired every 5 s. Scale bar: 2  $\mu$ m (B) Linescans of GPR161<sup>3NG</sup> fluorescence intensities along cilia at 60 s after photobleaching. The grey and green lines mark the average intensities along length-normalized cilia for control and SAG treated cells respectively. Error bar: SD.  $N = 10-11$  cilia. (C) GPR161<sup>3NG</sup> fluorescence at the tip was measured and the decay of fluorescence signal over time in control and SAG-treated cells was plotted. Data were fitted to a single exponential to calculate the half-life.  $t_{1/2}$ [control] = 5.14 +/- 0.95 s,  $t_{1/2}$ [SAG] = 10.47 +/- 1.76 s. Error range: error of fit.  $N = 10-11$  cilia. (D) <sup>NG3</sup>BBS5 fluorescence was measured in live cells after 40 min of incubation with WGA, sst, or both. The total number of BBS5 at the tip (right) or axoneme (left) was calculated using the NG3 calibrator and the measured ratio of <sup>NG3</sup>BBS5 to total BBS5. Asterisks indicate Mann Whitney test significance values; \*  $P < 0.05$ , \*\*\*  $P < 0.0005$ .  $N = 20-25$  cilia from 3 independent experiments. (E) Representative kymographs from mSA647-labeled WT or *Ar16*<sup>-/-</sup> IMCD3-[pEF1 $\alpha$ -<sup>NG3</sup>BBS5; pEF1 $\alpha$  <sup>$\Delta$</sup> -<sup>AP</sup>SSTR3] cells treated with sst for 1 h before imaging. The cells stably expressed an ER-localized biotin ligase BirA to enable visualization of <sup>AP</sup>SSTR3 by mSA647 labeling.



### Figure 8. Activated GPCRs undergo processive retrograde movements, and confinements at base and tip

(A) Diagram of the Qdot labeling strategy. IMCD3-[pEF1 $\alpha^{\Delta}$ -<sup>AP</sup>SSTR3<sup>NG</sup>] cells stably expressing BirA-ER were first treated with unlabeled mSA to passivate the surface-exposed biotinylated <sup>AP</sup>SSTR3. <sup>SA</sup>Qdots were then added to the medium to label the GPCRs newly arrived at the surface. Finally, biotin was added to the medium to passivate the excess SA on Qdots. (B) The diffusive properties of SSTR3 are not altered by Qdot labeling. The instantaneous velocities of mSA647-labeled <sup>AP</sup>SSTR3<sup>NG</sup> and Qdot655-labeled <sup>AP</sup>SSTR3<sup>NG</sup> were measured by single molecule tracking in the absence of sst. Error bars: SEM. (C) Qdot labeling does not alter the exit rate of SSTR3. IMCD3-[pEF1 $\alpha$ -<sup>AP</sup>SSTR3<sup>GFP</sup>] cells were sparsely labeled with Qdot655 as described in Methods and treated with vehicle or sst for 2h before fixation. The number of Qdot per cilium was counted in both vehicle or sst treated condition.  $N = 263$ -303 cilia from three independent experiments. Error bars: SEM. (D) Representative kymographs showing the movements of <sup>SA</sup>Qdot-labeled ciliary <sup>AP</sup>SSTR3<sup>NG</sup> (<sup>QD</sup>SSTR3) in vehicle- or sst-treated cells. Red labels and line coloring highlight four characteristic movement behaviors. Scale bar: 2  $\mu$ m. (E) Centroid mapping of <sup>QD</sup>SSTR3. Left: the contour of the cilium was traced as a dotted line that captures all <sup>QD</sup>SSTR3 positions. (i) diffusive movement, (ii) tip confinement followed by retrograde movement, (iii) retrograde movement followed by base confinement and return into the cilium, and (iv) tip confinement followed by fully processive retrograde movement and base confinement. The time dimension is color-coded from red to purple. (F-G) Signaling increases tip confinement and processive retrograde movement of SSTR3. Cells were treated with sst (green, sst) or vehicle (grey, Control) for 40 min before imaging was initiated for 10 to 20 min. (F) Durations of persistent movement events for <sup>QD</sup>SSTR3 in anterograde and retrograde directions. (G) The durations of confinement events for <sup>QD</sup>SSTR3 at ciliary tip or base were binned into two categories.  $N = 12$  cilia for each condition. (H) Representative kymographs showing the co-movement between a single <sup>QD</sup>SSTR3 and a BBSome retrograde train. IMCD3-[pEF1 $\alpha$ -<sup>NG3</sup>BBS5; pEF1 $\alpha^{\Delta}$ -<sup>AP</sup>SSTR3] cells were treated with sst for 40 min before imaging.

**Figure 9. GPCR base confinement results in either exit or re-entry**

(A) Cilium kymograph of <sup>QD</sup>GPR161. Cells were treated with SAG for 40 min before the start of imaging. Green, red and purple labels and line coloring indicate retrograde movements, confinement and anterograde transport (events i and ii) or exit from cilia (iii). Scale bar: 2  $\mu$ m. (B) Time series of the three confinement events. A reference image of bulk NG fluorescence from <sup>AP</sup>GPR161<sup>NG3</sup> was overlaid with images of <sup>QD</sup>GPR161. Time stamp (s) is in the upper left corner. Scale bar: 2  $\mu$ m. t: tip. b: base. (C) Centroid mapping of <sup>QD</sup>GPR161 during event iii. The <sup>QD</sup>GPR161 locations captured during the entire imaging session are shown as grey dots. The green track represents a processive retrograde transport event that precedes confinement of <sup>QD</sup>GPR161 (shown in red dots) at the base. Immediately before diffusion away from the cilium (purple track), <sup>QD</sup>GPR161 was nearly immobile for 4.5 s (purple dots). (D) Dot plot showing the base residence time of <sup>QD</sup>GPR161 during unproductive events (grey circles) or before exit (green boxes). IMCD3-[pCrys-<sup>AP</sup>GPR161<sup>3NG</sup>] cells were treated with SAG for 40 min before imaging. (E) Scatter plot of areas explored by <sup>QD</sup>GPR161 during base residence events versus time. Grey circles represent unproductive events and green circles represent pre-exit base residence events. Linear regression shows no obvious correlation between these two variables (Pearson correlation coefficient  $r = 0.3$ ).

**Figure 10. GPR161 traverses the transition zone in an Arl6- and signaling-dependent manner**

(A) Representative images of a base residence event for  $^{QD}$ GPR161 after 40 min of SAG treatment. The most base-proximal position of  $^{QD}$ GPR161 (red) relative to bulk  $^{AP}$ GPR161 $^{NG3}$  fluorescence (green) is highlighted by a red box and the enlarged image is shown in (B). Scale bar: 1  $\mu$ m. (B) Linescans of the fluorescence intensities of  $^{QD}$ GPR161 (red dotted line) and  $^{AP}$ GPR161 $^{NG3}$  (green line) along the length of cilia. (C) Since the longitudinal profile of  $^{AP}$ GPR161 $^{NG3}$  fluorescence is highly reproducible and unchanged by fixation (Fig. S5C), the profile of  $^{AP}$ GPR161 $^{NG3}$  can be used as a common reference to align the positions of  $^{QD}$ GPR161, Cep290 and Cep164 with respect to one another. WT or *Arl6* $^{-/-}$  IMCD3-[pCrys- $^{AP}$ GPR161 $^{3NG}$ ] cells treated with SAG or vehicle for 40 min before imaging. The most base-proximal positions of the centroid of  $^{QD}$ GPR161 relative to the profile of  $^{AP}$ GPR161 $^{NG3}$  were plotted as thin lines and the means plotted as thick lines. The same method was used to plot the positions of immunofluorescence-stained Cep290 and Cep164 relative to  $^{AP}$ GPR161 $^{NG3}$  fluorescence. Scale bar: 1  $\mu$ m.  $N = 15-26$ . (D-E) The lateral displacement between the centroid of  $^{QD}$ GPR161 at its most base-proximal position and the center axis of  $^{AP}$ GPR161 $^{NG3}$  fluorescence was box plotted. The lateral displacement informs the half-width of the cilium base (control) or the intermediate compartment (SAG). IMCD3-[pCrys- $^{AP}$ GPR161 $^{3NG}$ ] cells were treated with SAG or vehicle for 40 min before imaging. Scale bar: 0.5  $\mu$ m.  $N = 11-16$  cilia. (F) Two-barrier model for exit from cilia. The intermediate compartment is displayed in tan color, the cilium shaft is blue and the cell is gray. GPCR is green, agonist is red, BBSome/*Arl6* coats are yellow. TF: transition fibers, TZ: transition zone, IC: intermediate compartment, PCB: periciliary barrier. The diagram is not drawn to scale.

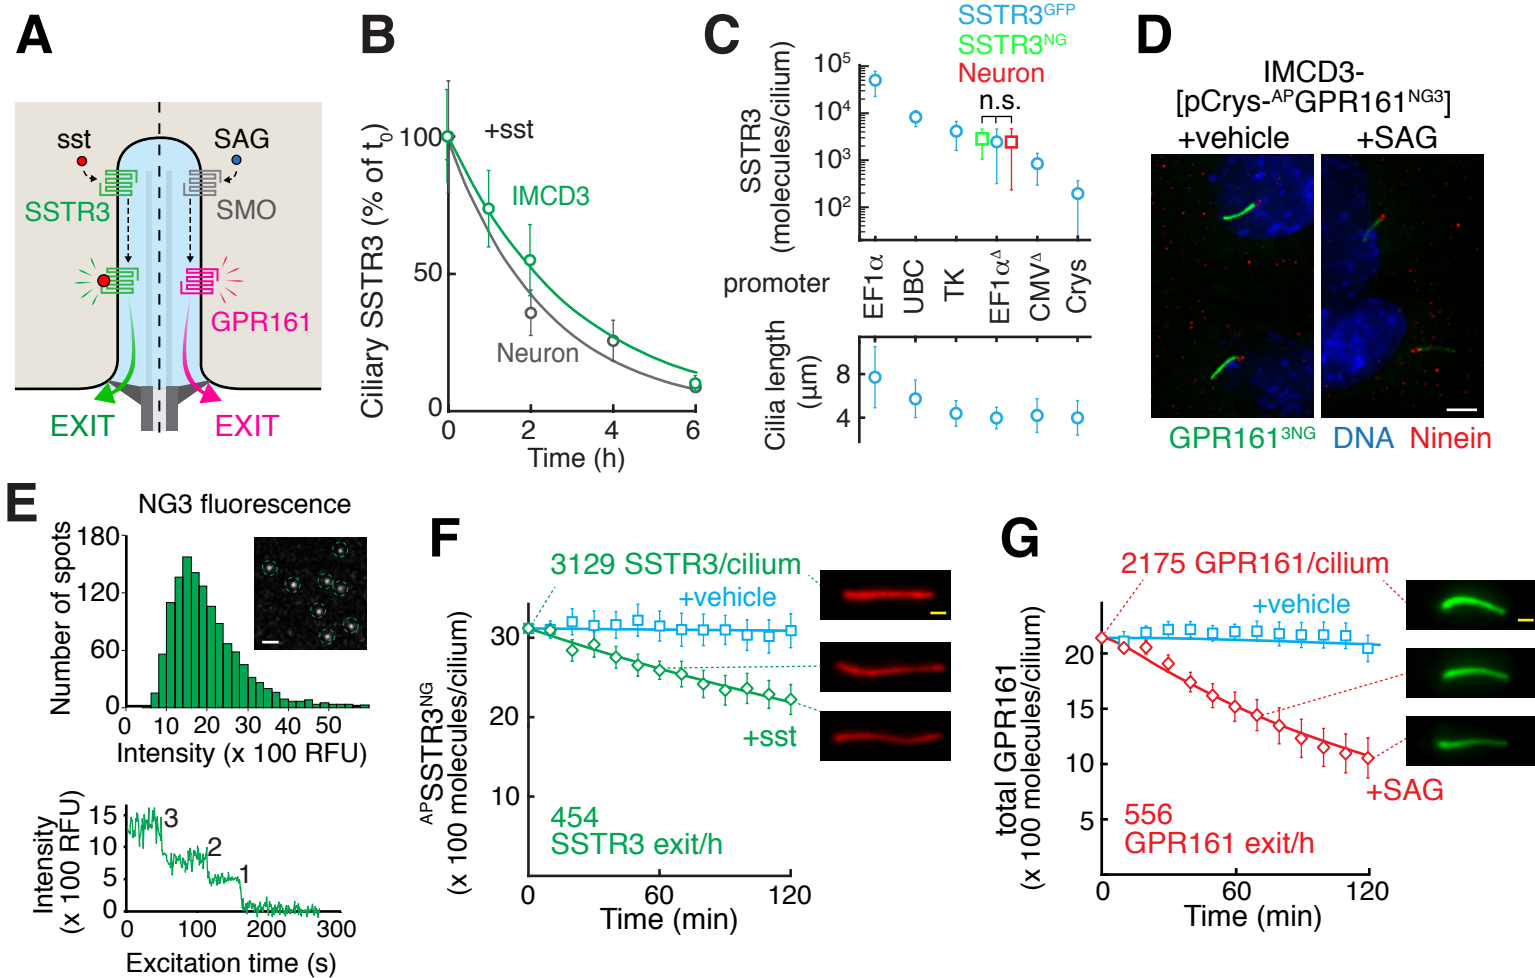

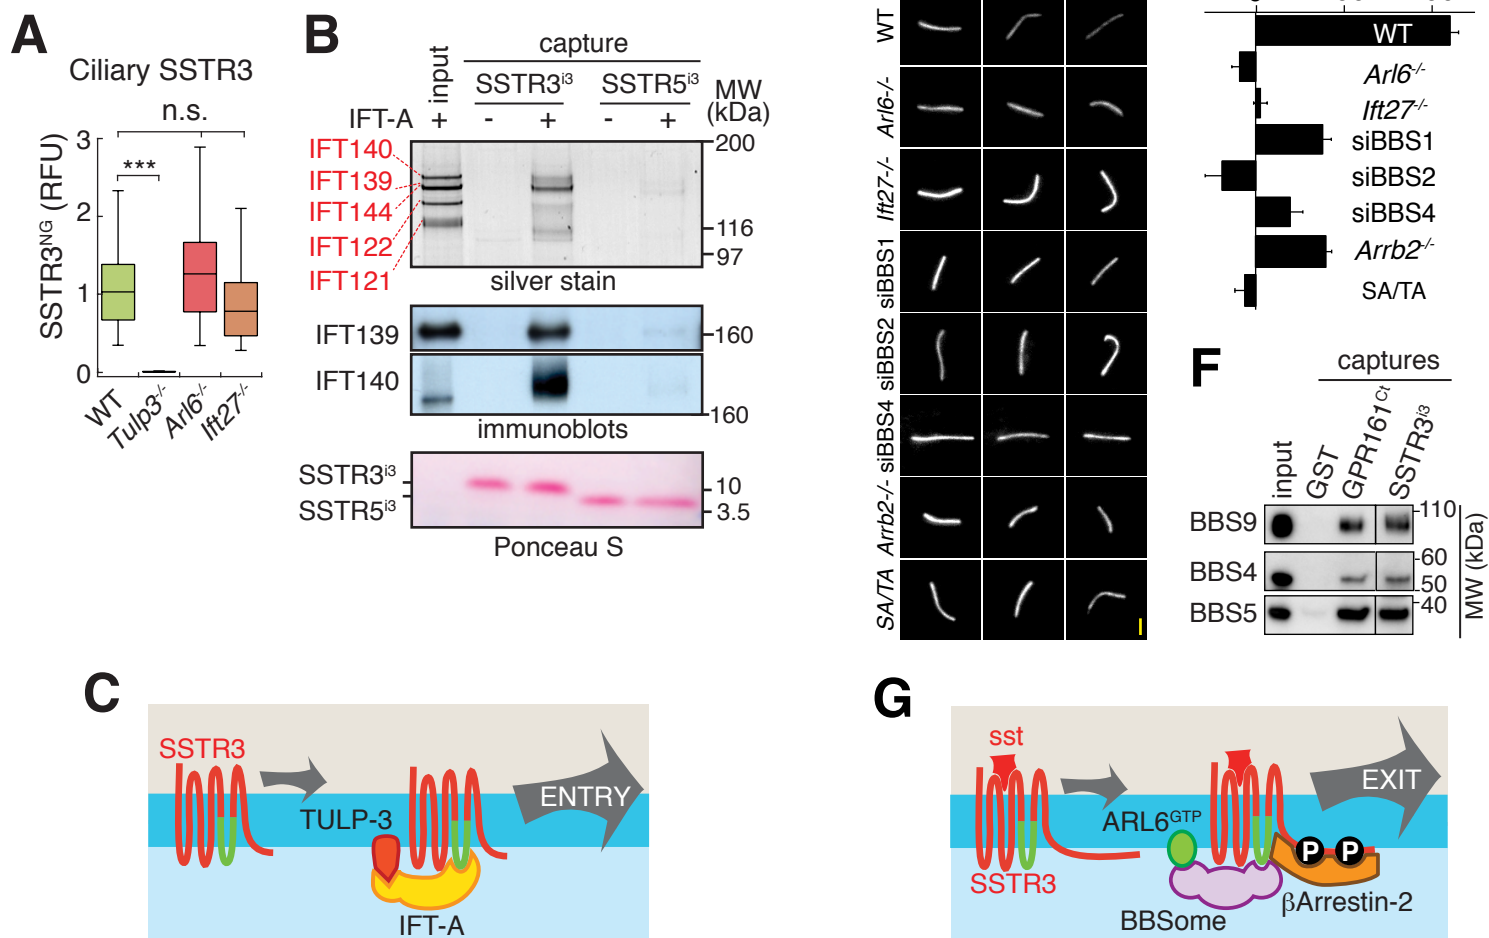

Ye et al., Figure 2

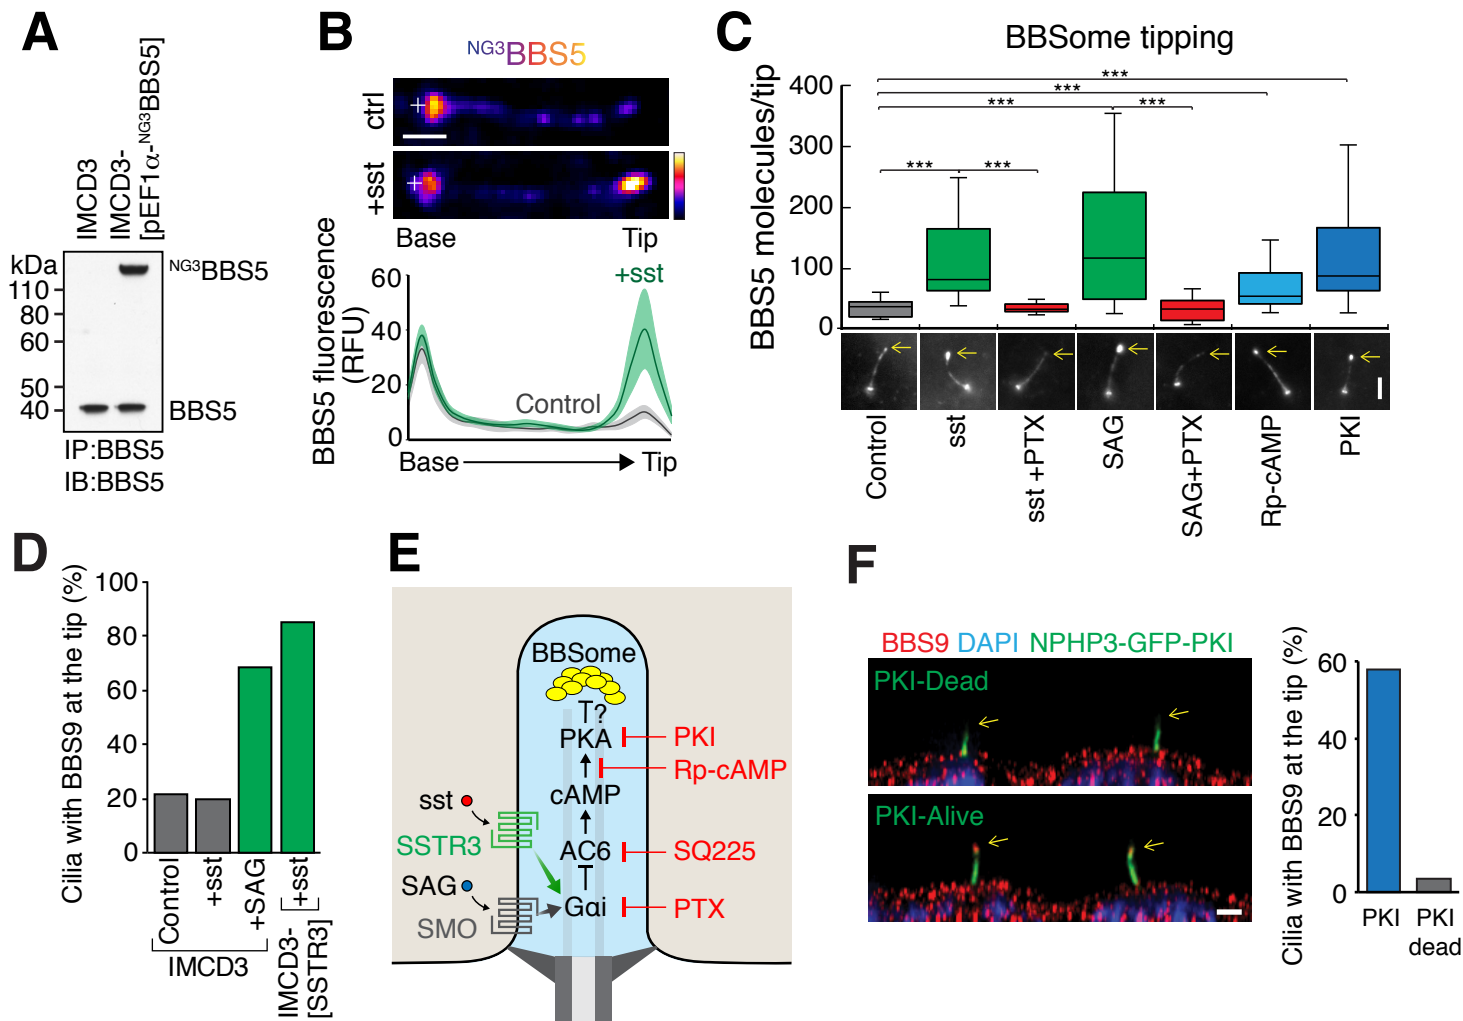

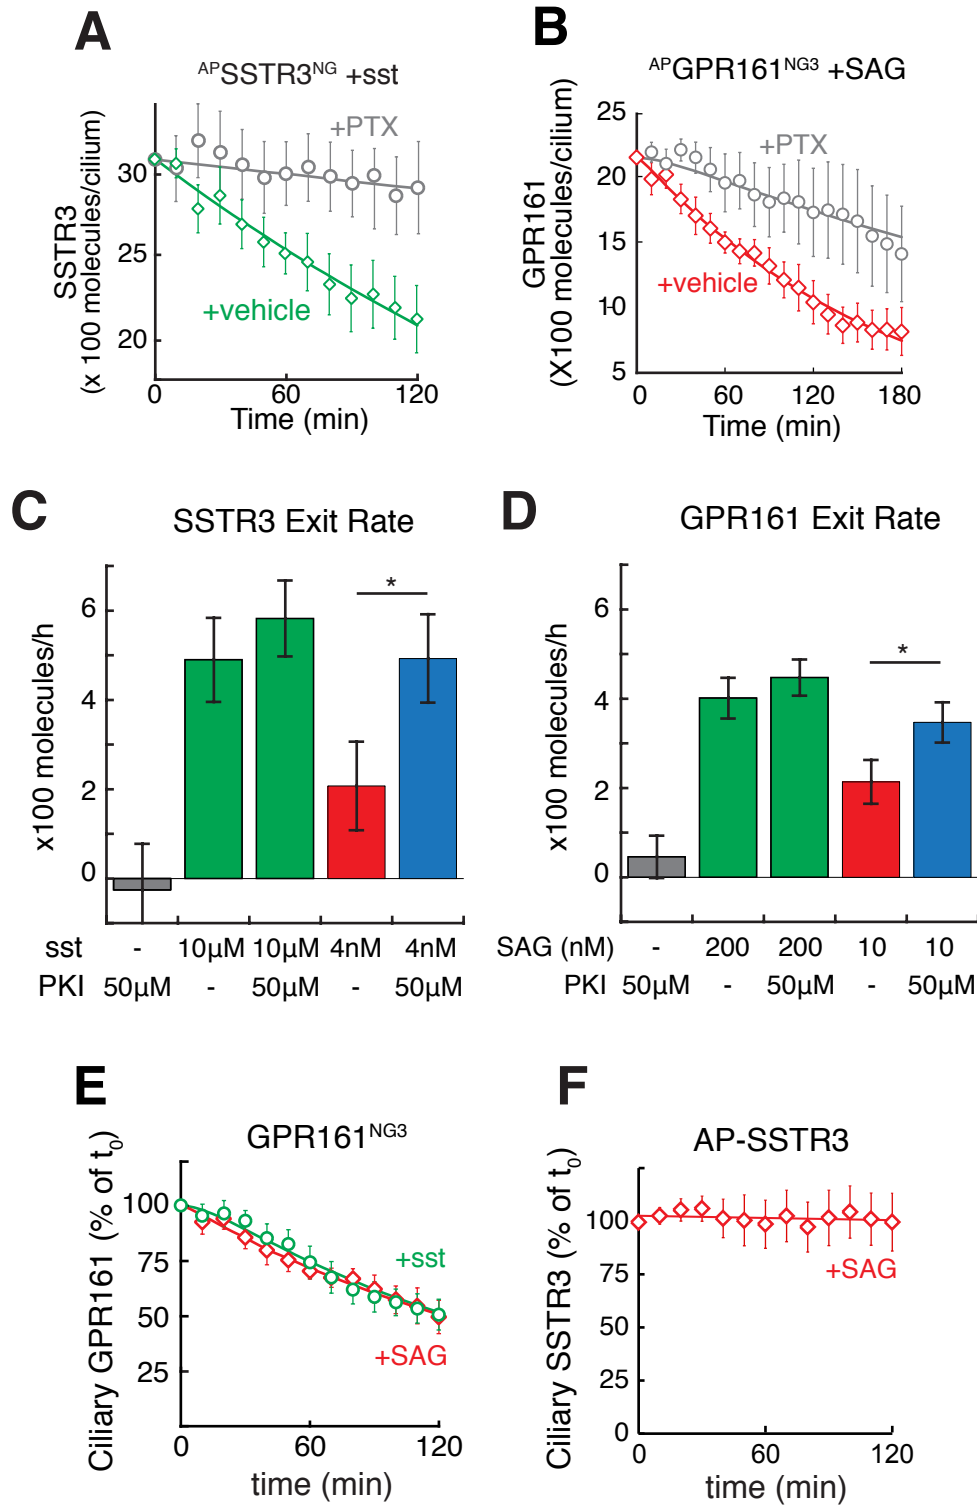

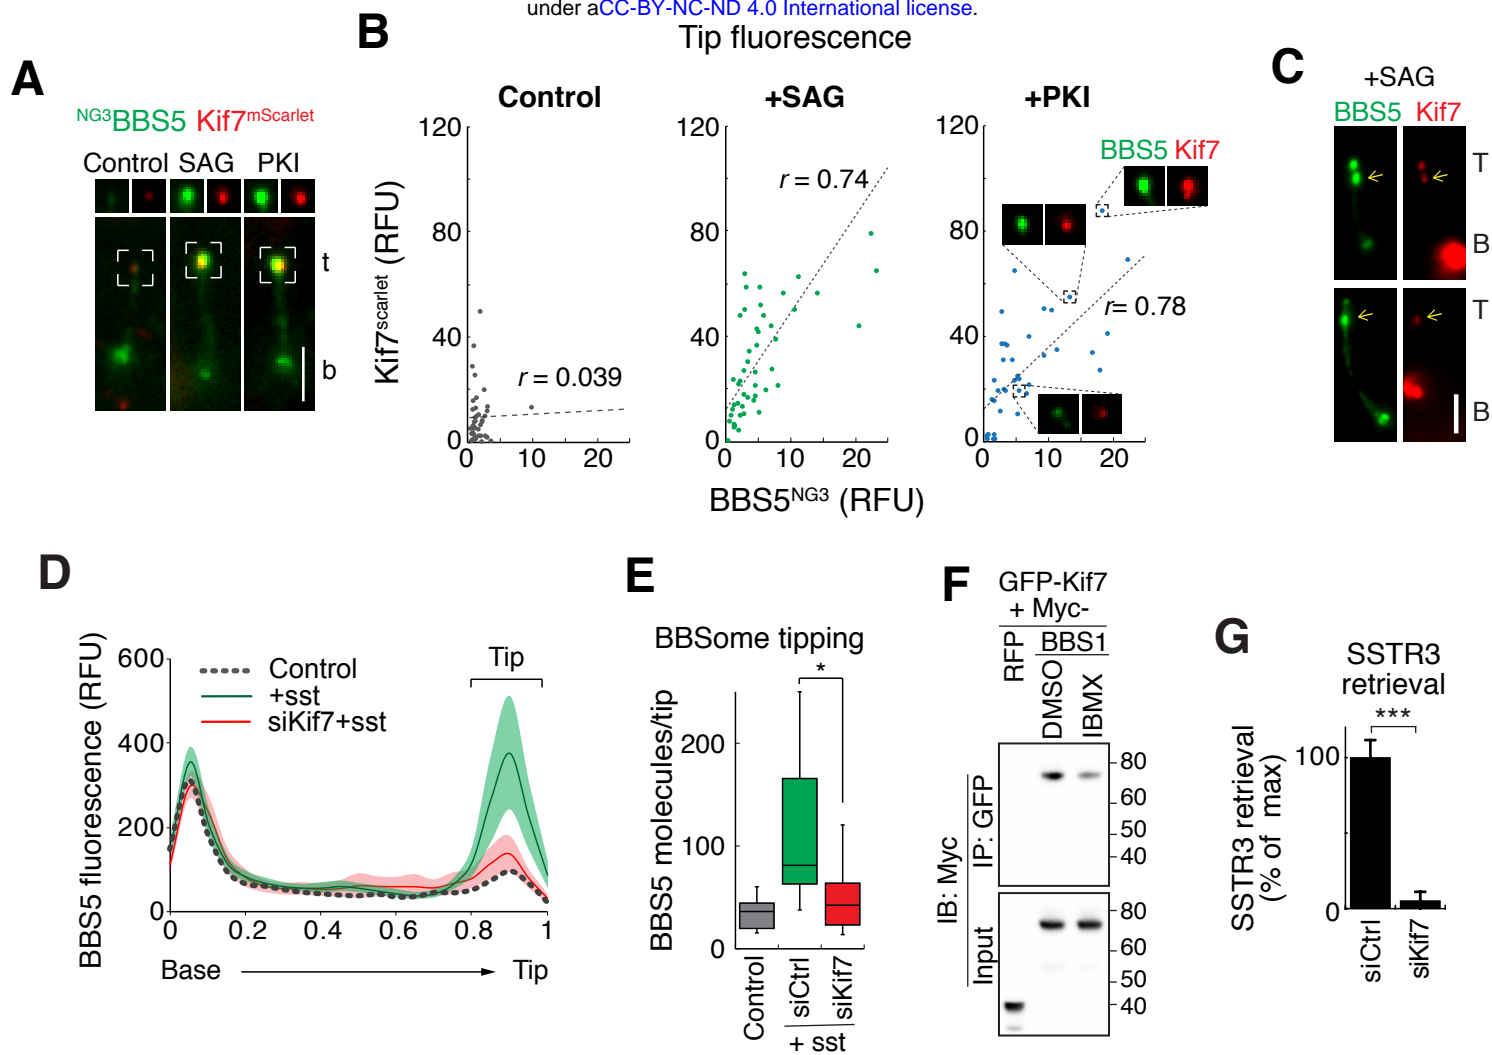



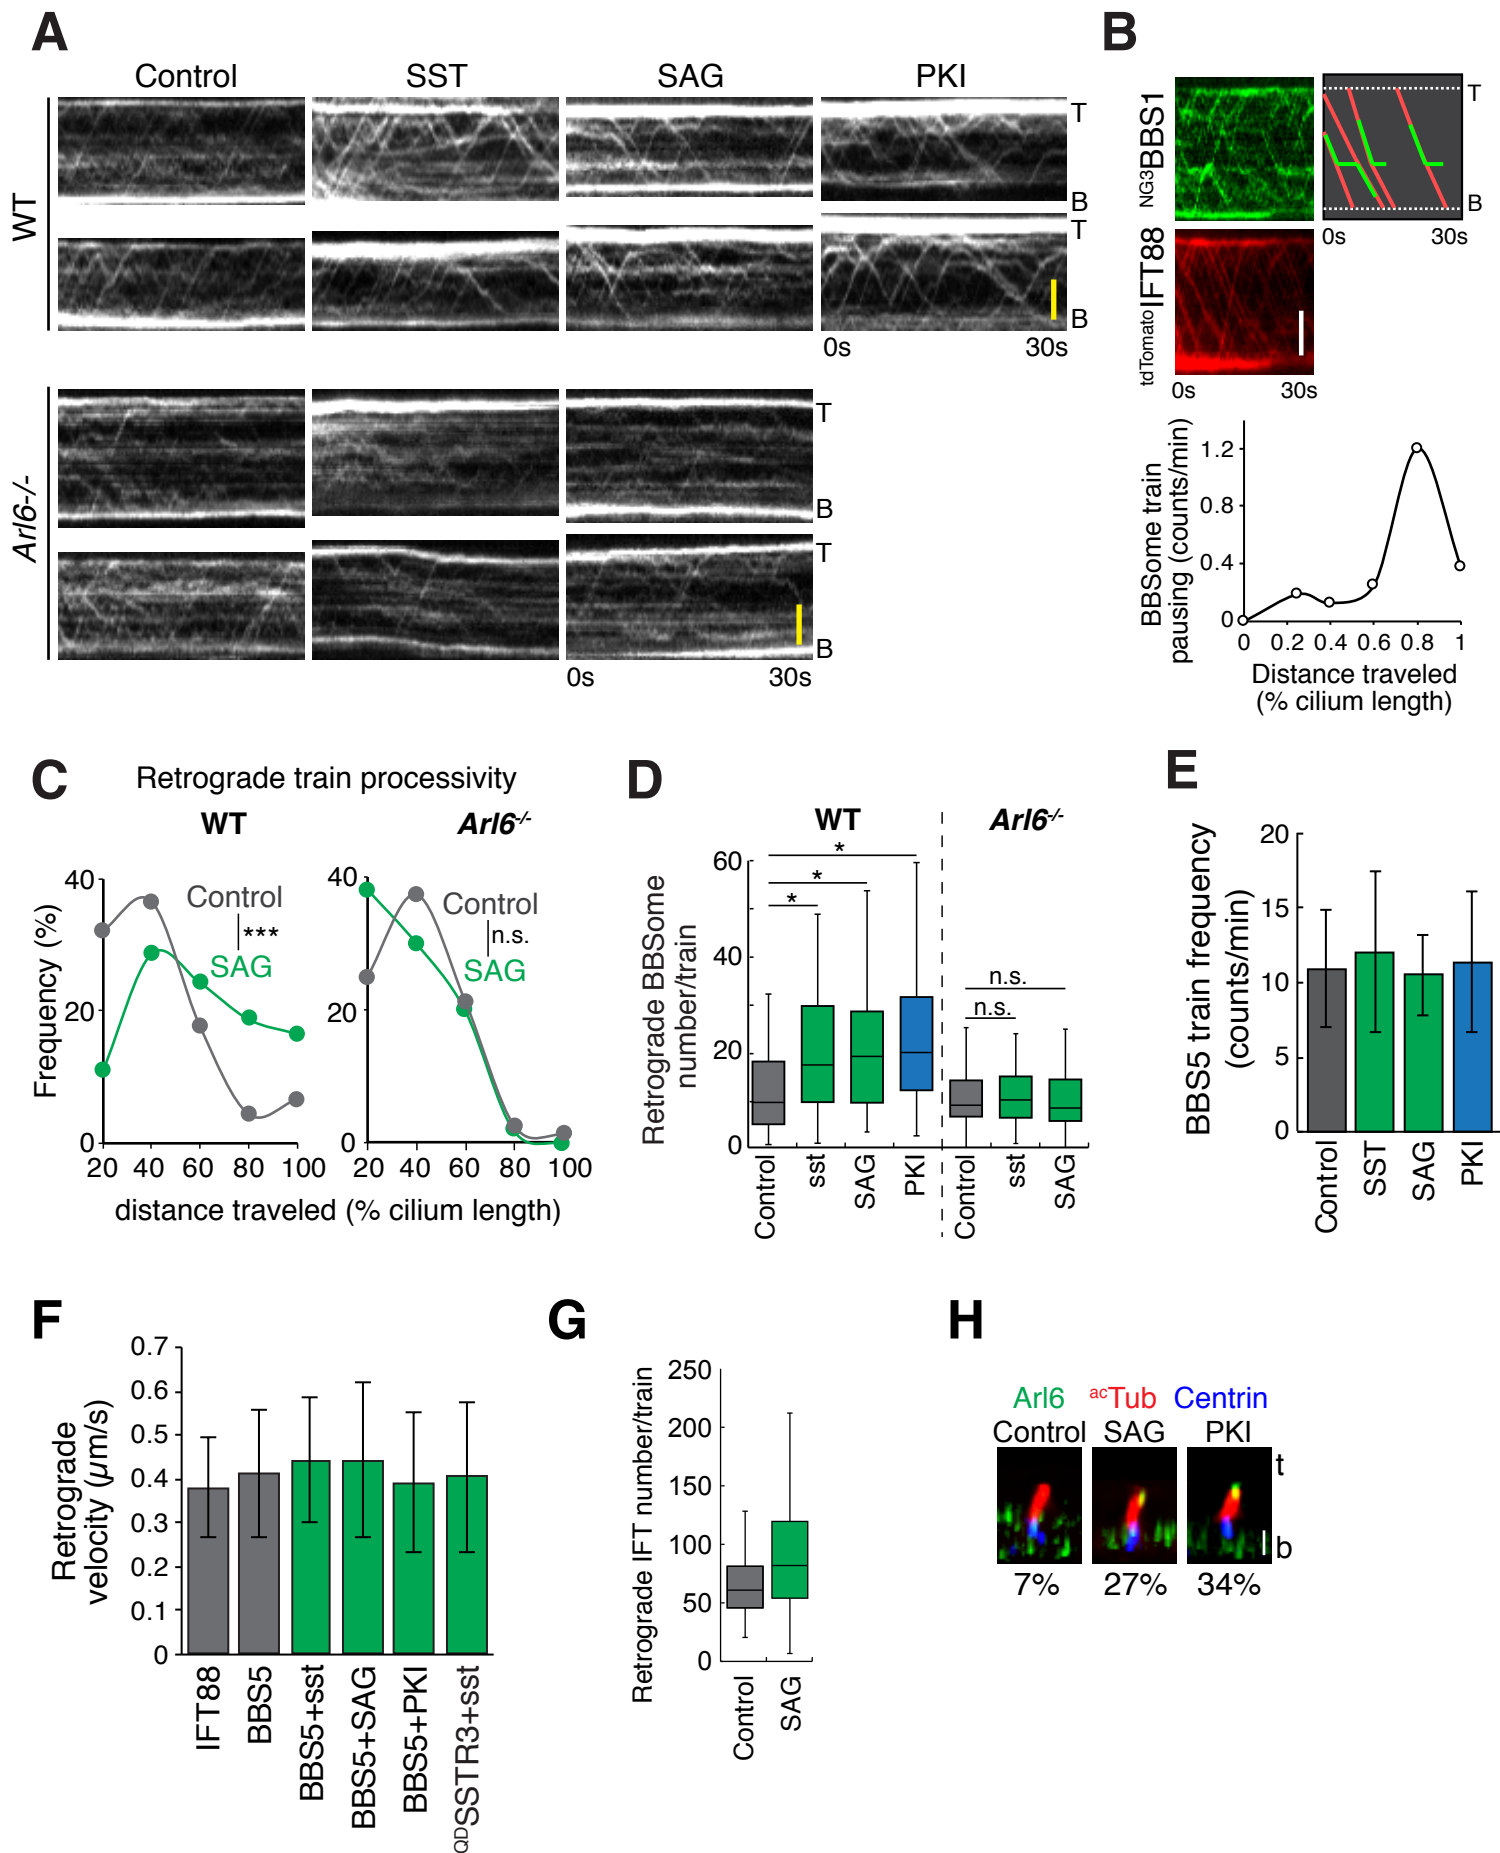

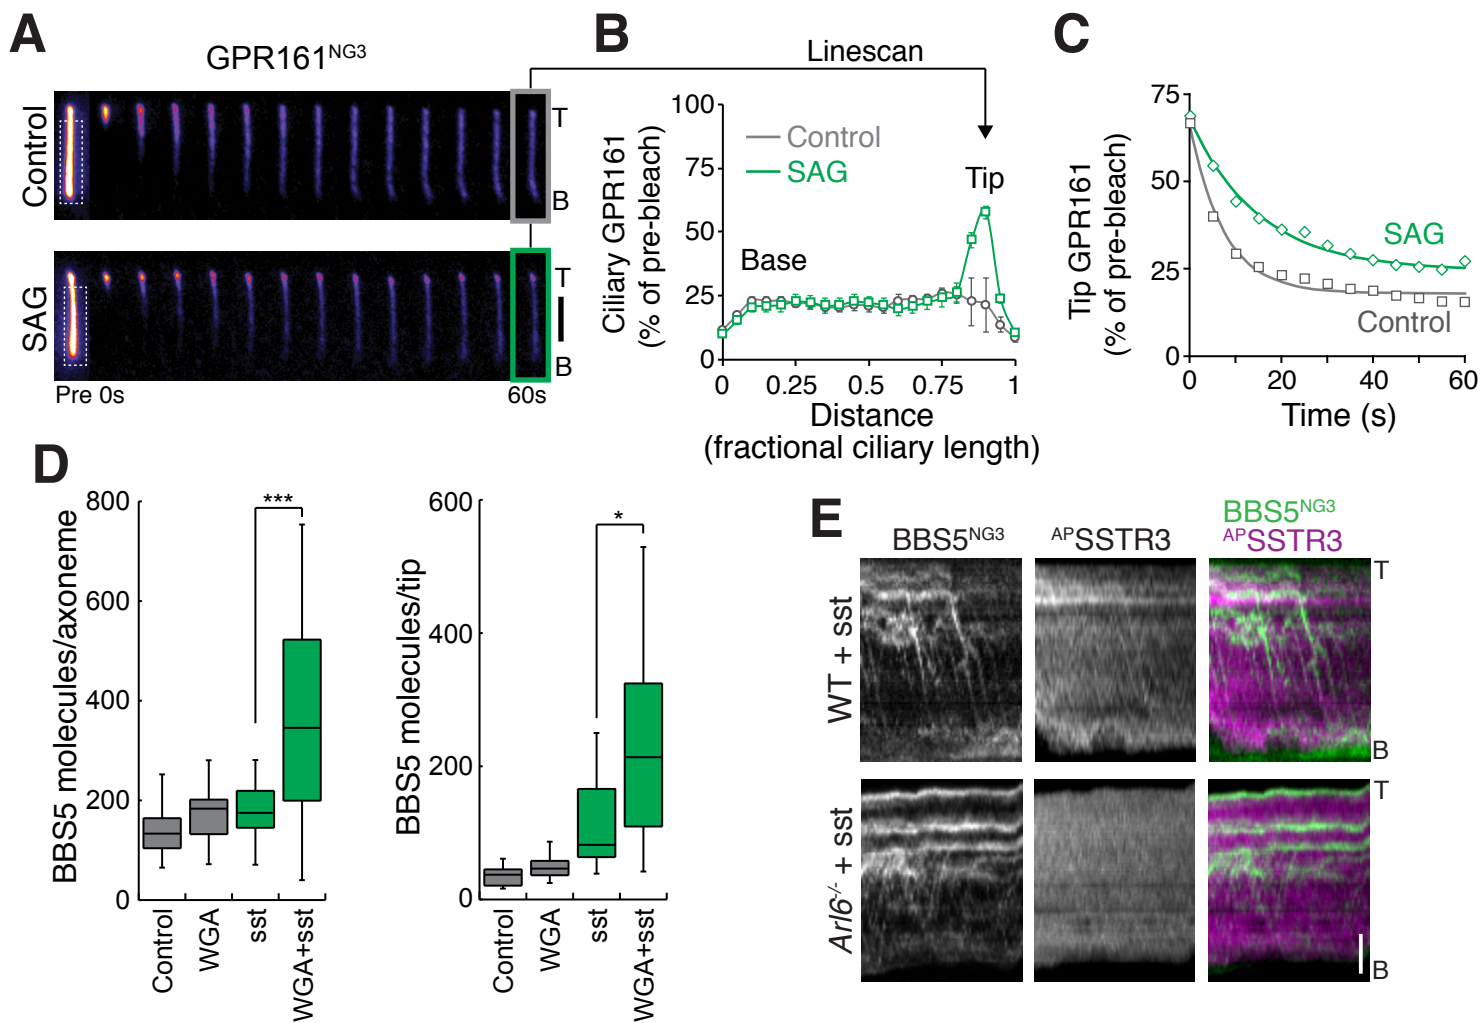

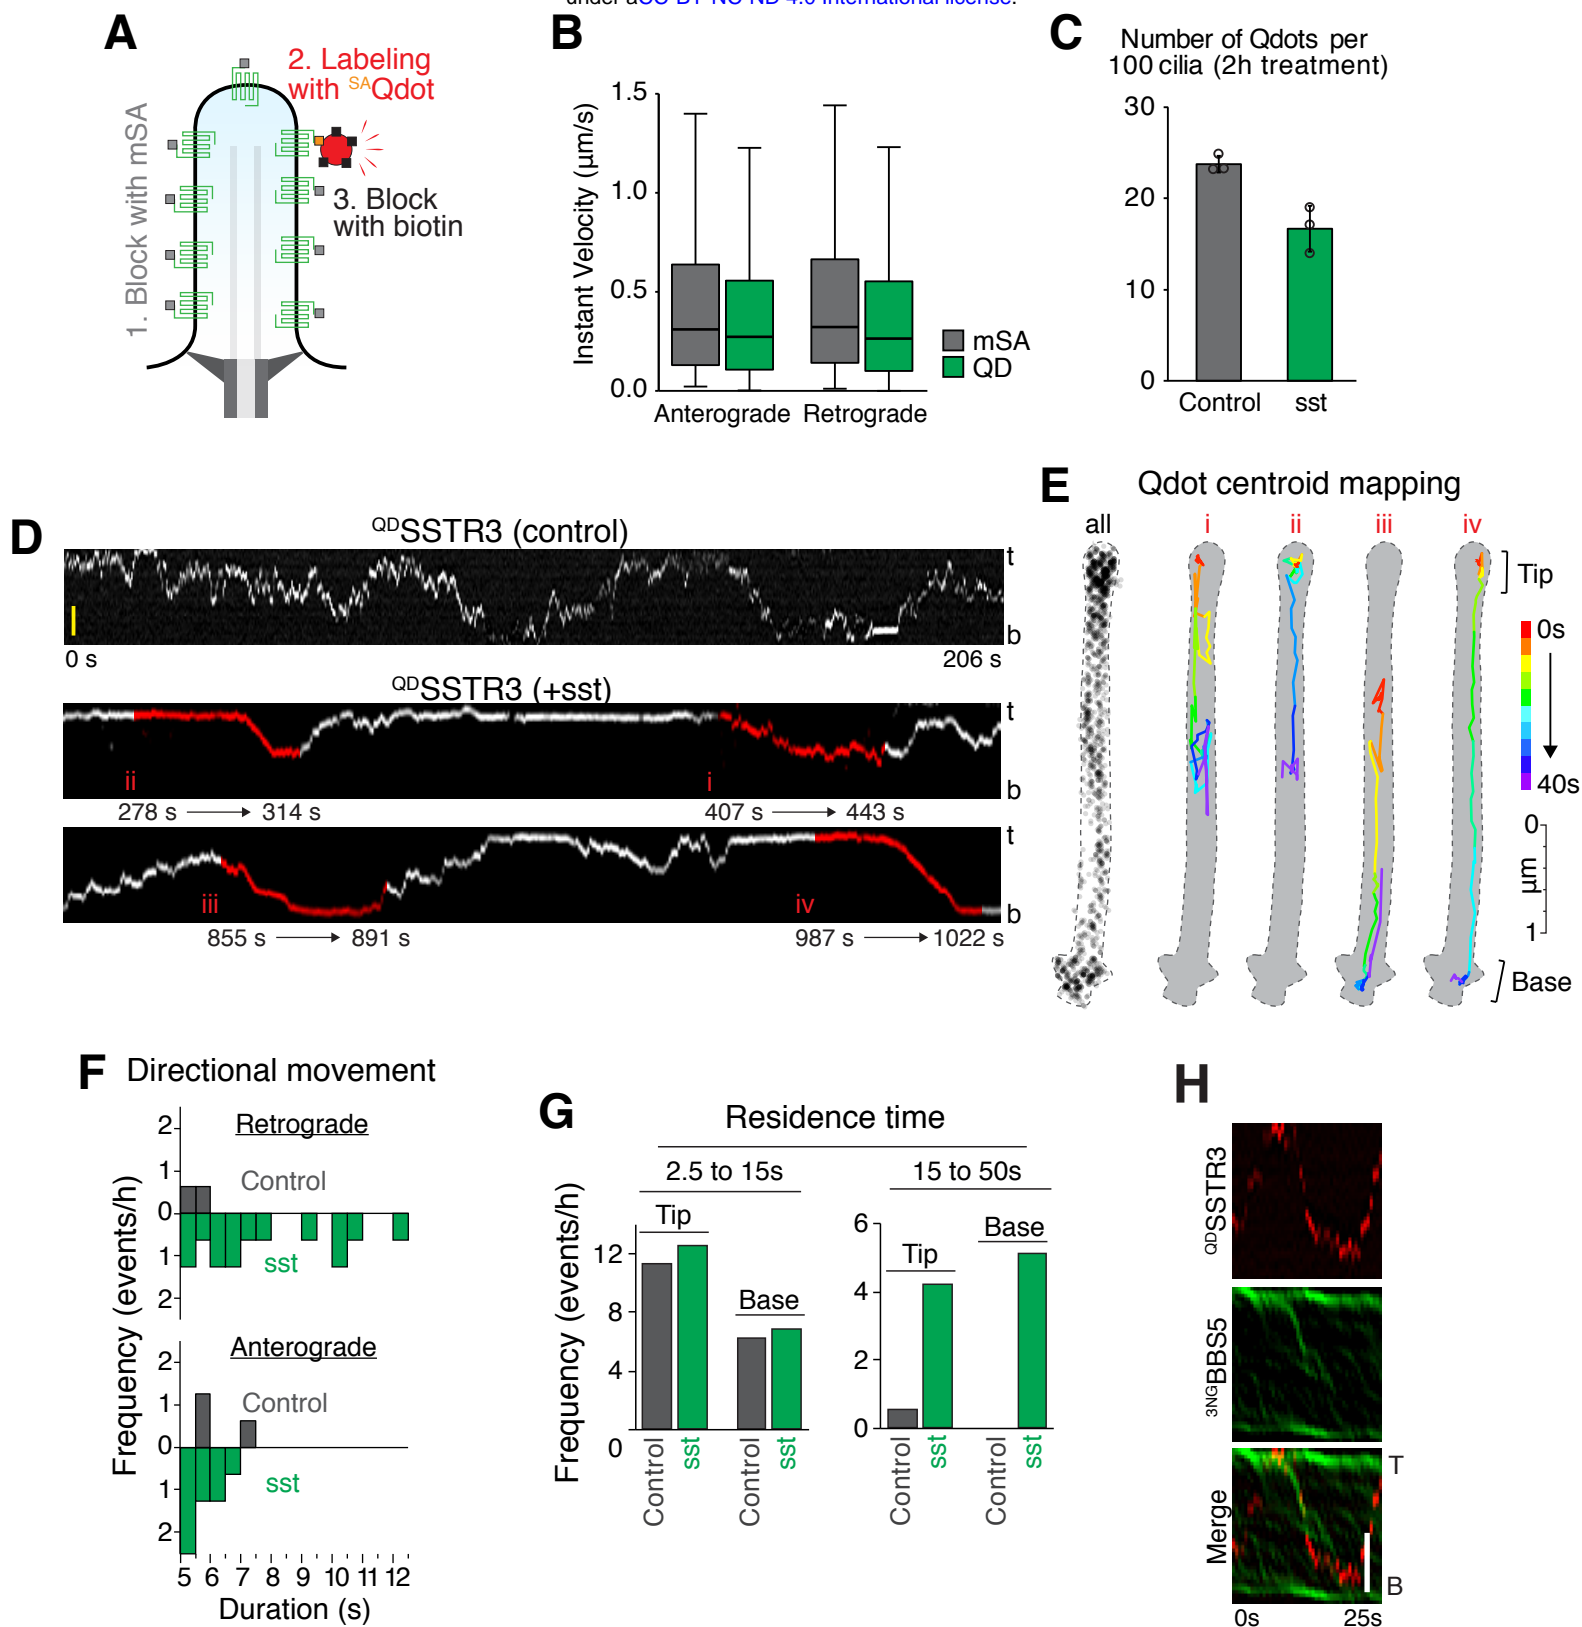

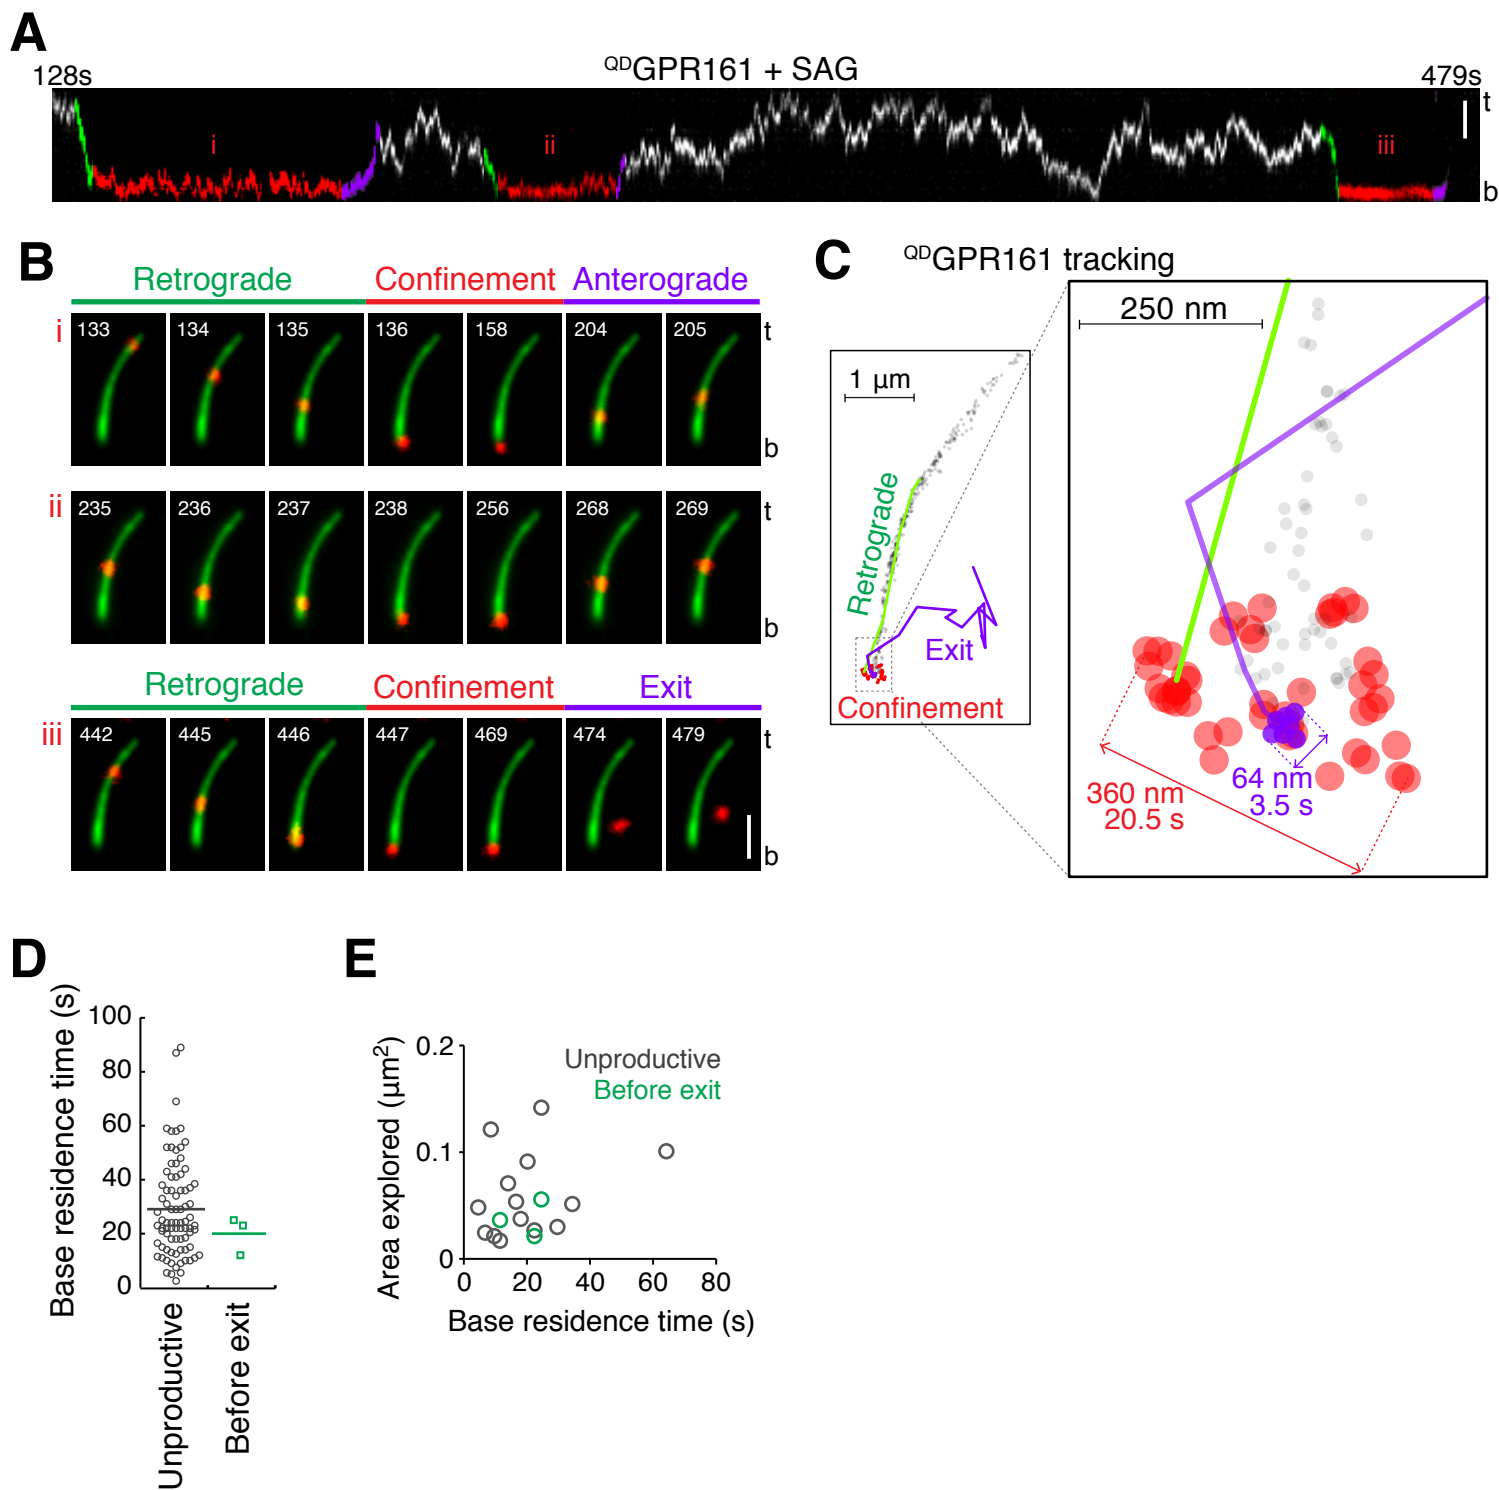

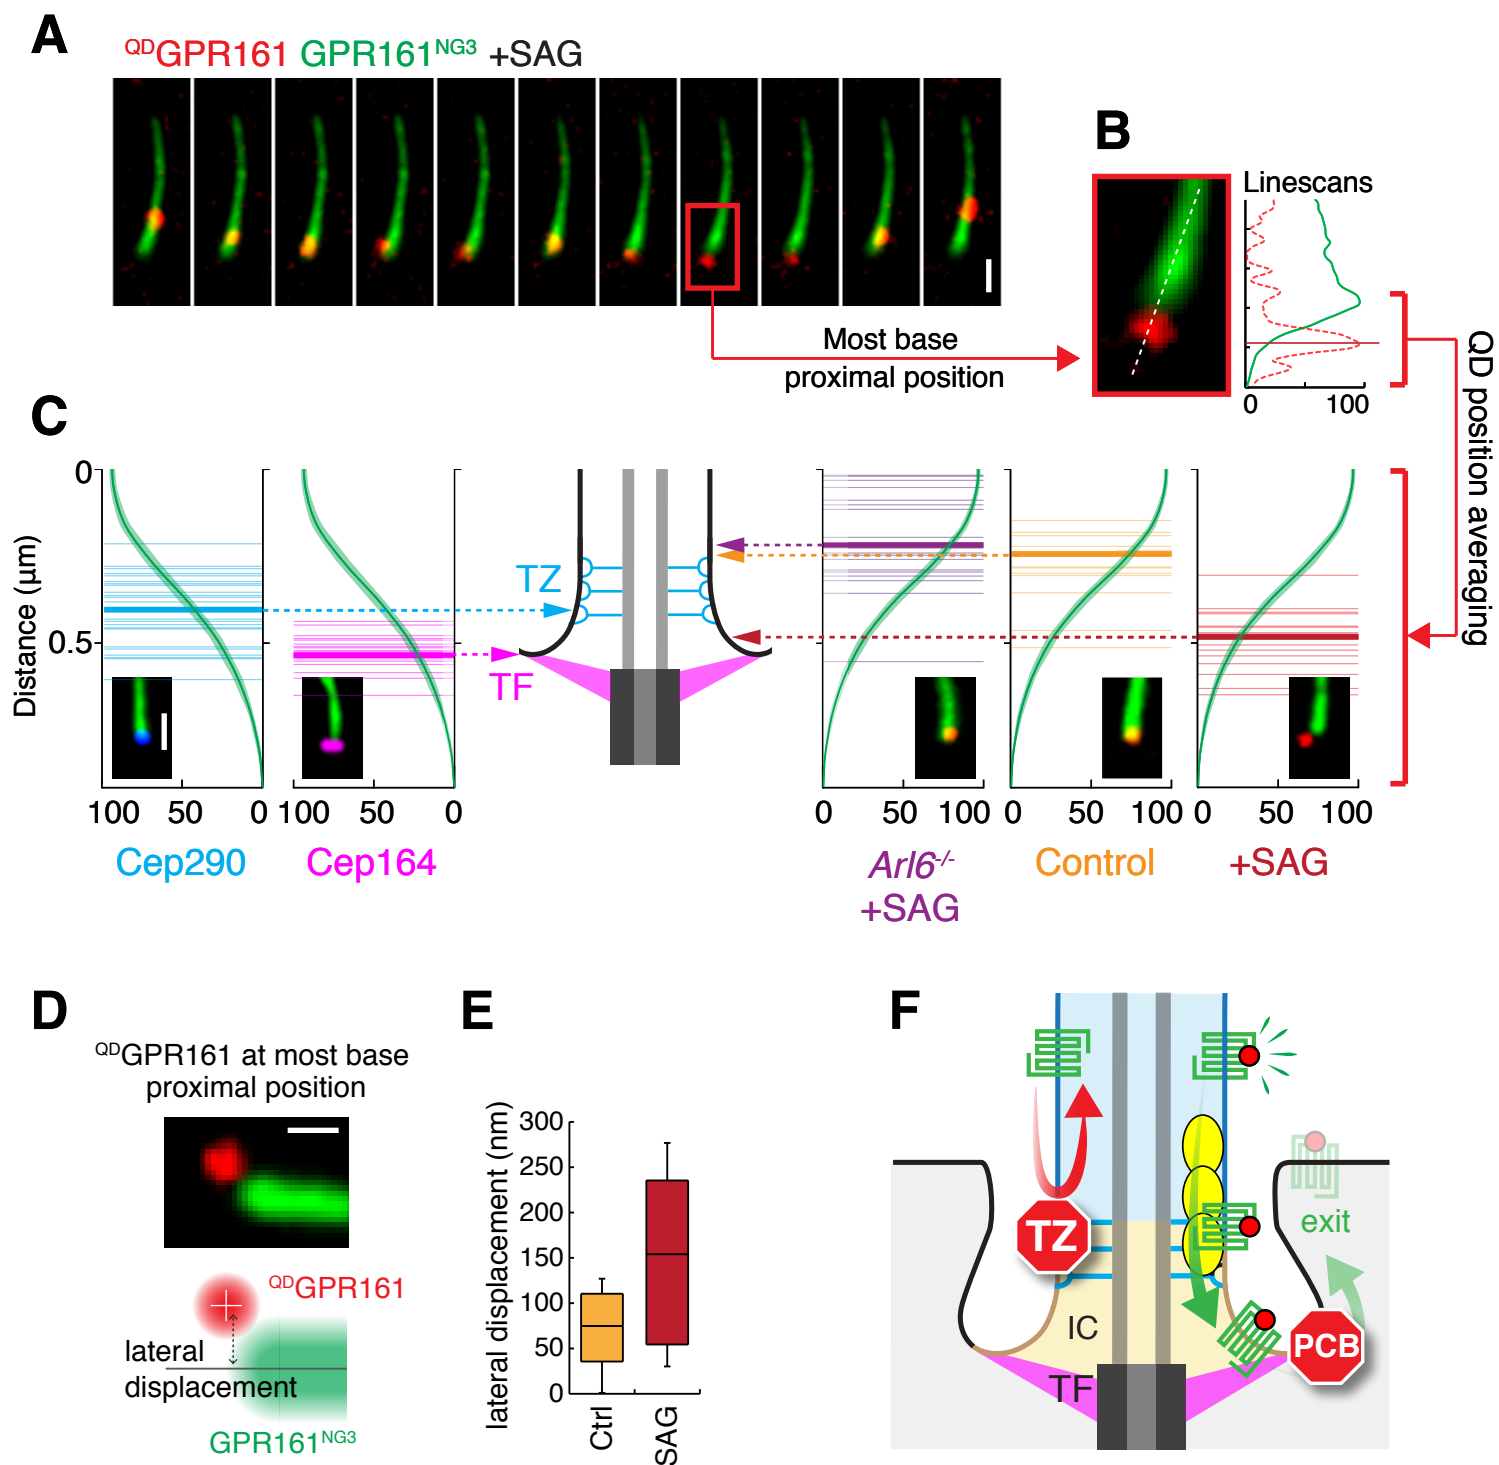

Source: https://www.biorxiv.org/content/10.1101/180620v2.full.pdf
